# Supplementary material for: Conditional chemoconnectomics (cCCTomics) as a strategy for efficient and conditional targeting of chemical transmission
Source: eLife journal article supplement (doi:10.7554/elife.91927), 2023-12-19
Supplement: fig1-data1 [file Figure 1-Source data.xlsx]

## Sheet: fig1K
ZT(h)	GMR57C10-GAL4/+;CCTC-nAChRβ2/UAS-FLP, nAChRβ2-attpKO			CCTC-nAChRβ2/UAS-FLP,nAChRβ2-attpKO			nAChRβ2-attpKO			W1118			GMR57C10GAL4/+;CCTC-nAChRβ2/nAChRβ2-attpKO
0.5	39.1111	115.21	45	150.75	275.849	48	20.4688	65.2888	32	26.7083	83.6231	48	25.0625	83.978	48
1	107.044	289.883	45	269.708	409.085	48	146.531	306.759	32	156.875	303.264	48	142.667	334.013	48
1.5	145	277.945	45	718.812	547.139	48	200.062	379.932	32	392.333	490.731	48	390.875	529.636	48
2	297.756	449.073	45	1163.75	526.498	48	487.844	458.92	32	837.979	562.81	48	829.292	651.902	48
2.5	449.356	545.08	45	1285.71	470.909	48	956.188	539.811	32	983.812	531.384	48	881.562	567.464	48
3	655.644	581.454	45	1417.56	477.078	48	1055.56	568.695	32	1006.6	424.917	48	1117.79	517.951	48
3.5	816.489	607.962	45	1478.06	418.075	48	725.719	596.536	32	1259.96	436.182	48	1187.23	496.524	48
4	903	613.869	45	1418.9	400.372	48	731.5	599.587	32	1071.27	505.055	48	1166.19	528.207	48
4.5	902.489	617.313	45	1445.35	479.56	48	657.375	576.567	32	1227.44	419.413	48	1221.25	522.378	48
5	980.911	605.054	45	1492.4	408.503	48	781	454.716	32	1361.9	385.022	48	1097.79	499.106	48
5.5	1113.31	455.414	45	1532.56	406.851	48	666.5	548.832	32	1227.94	413.982	48	1199.54	528.407	48
6	938.356	489.122	45	1498.62	348.463	48	772.156	560.583	32	1291.33	420.561	48	1264.23	460.873	48
6.5	915.667	572.1	45	1434.81	527.585	48	707.656	531.205	32	1315.81	402.513	48	1085.35	490.784	48
7	932.356	619.355	45	1317.21	425.91	48	922.562	574.396	32	1212.38	415.585	48	1178.92	550.078	48
7.5	877.778	511.437	45	1300.44	590.338	48	868.562	582.658	32	1193.38	462.052	48	1038.65	525.329	48
8	750.333	573.402	45	1274.94	462.32	48	662.562	554.451	32	1242.15	452.653	48	1207.79	502.842	48
8.5	989.222	519.369	45	1363.4	473.492	48	839.312	531.294	32	1056.21	519.668	48	986.188	494.429	48
9	678.667	603.167	45	973.917	491.936	48	531.031	473.428	32	1092.94	527.738	48	1068.58	575.804	48
9.5	439.889	501.536	45	869.75	545.726	48	395.844	502.204	32	926.583	477.45	48	792.062	581.699	48
10	329.911	433.272	45	454.021	420.123	48	312.938	404.062	32	799.688	423.829	48	804.729	532.143	48
10.5	193.778	367.749	45	331.812	397.558	48	213.125	313.951	32	571.5	490.64	48	435.688	518.705	48
11	65.9778	164.32	45	141.479	241.822	48	93.2188	209.471	32	251.104	384.944	48	229.75	335.494	48
11.5	2.46667	16.362	45	20.2292	113.49	48	21.7188	84.882	32	80.5417	157.698	48	28.6458	111.114	48
12	6.37778	42.3054	45	3.60417	24.7089	48	0	0	32	33.7917	168.78	48	0	0	48
12.5	16.2444	101.61	45	6.91667	47.4183	48	16.9062	94.13	32	54.1458	176.865	48	0	0	48
13	225.289	417.497	45	158.625	369.336	48	83.3125	249.484	32	805.708	626.508	48	38.2292	129.935	48
13.5	555.644	602.902	45	551.438	566.166	48	281	515.31	32	1415.94	563.156	48	293.854	520.876	48
14	847.644	628.777	45	840.958	605.807	48	566.656	754.775	32	1554.9	382.778	48	686.021	681.993	48
14.5	971.822	568.992	45	1094.33	549.168	48	821.844	764.986	32	1518.19	367.745	48	951.271	669.104	48
15	942.889	593.041	45	920.562	560.511	48	742.5	723.215	32	1534.52	311.33	48	1171.35	578.555	48
15.5	927.911	611.229	45	1231.04	428.29	48	822.938	742.744	32	1598.1	267.249	48	1333.1	399.81	48
16	894.356	663.205	45	1269.1	422.328	48	940.344	685.362	32	1514.83	476.53	48	1250.44	487.529	48
16.5	835	521.876	45	1299.9	430.446	48	690.656	643.942	32	1562.96	299.431	48	1104.71	584.798	48
17	833.667	572.415	45	1277.75	341.745	48	827.438	627.669	32	1395.31	380.086	48	1075.29	526.374	48
17.5	896	541.675	45	1335.35	443.231	48	1029.53	661.451	32	1439.75	434.786	48	1077.02	579.52	48
18	800.489	634.604	45	1266.4	457.982	48	896.156	711.243	32	1390.62	438.443	48	1234.94	492.952	48
18.5	930.844	526.668	45	1262.19	466.505	48	872.219	743.881	32	1351.1	444.131	48	1165.96	564.563	48
19	1076.71	553.044	45	1407.46	432.6	48	817.062	726.581	32	1376.77	331.355	48	1140.1	522.76	48
19.5	1012.16	600.792	45	1217.62	490.245	48	848.625	626.25	32	1386.73	474.213	48	1290.69	418.569	48
20	1066.11	602.792	45	1194.9	519.175	48	722.531	679.536	32	1448.6	357.098	48	1159.6	558.013	48
20.5	986.844	662.665	45	1354.19	492.851	48	956.875	712.575	32	1419.21	419.719	48	1052.9	617.268	48
21	921.956	630.9	45	1293.69	498.283	48	1049.09	648.993	32	1385.92	406.44	48	993.312	628.029	48
21.5	852.511	631.145	45	1190.48	455.772	48	955.094	675.593	32	1201.71	444.749	48	863.146	614.885	48
22	747.644	593.795	45	1037.02	584.64	48	851.75	677.002	32	1217.65	486.123	48	893.75	584.145	48
22.5	793.467	636.444	45	1018.5	577.801	48	903	737.508	32	1022.25	555.699	48	814.208	526.64	48
23	774.444	690.944	45	900.917	592.078	48	806.125	709.729	32	970.938	580.543	48	746.729	595.316	48
23.5	547.178	609.231	45	455.917	531.572	48	641.906	694.871	32	755.396	613.981	48	636.396	543.997	48
24	284.511	481.978	45	166.208	337.441	48	254.812	463.829	32	689	606.206	48	266.938	491.113	48

## Sheet: fig1L
CCTC-nAChRβ2/UAS-FLP,nAChRβ2-attpKO	GMR57C10GAL4/+;CCTC-nAChRβ2/nAChRβ2-attpKO	GMR57C10-GAL4/+;CCTC-nAChRβ2/UAS-FLP, nAChRβ2-attpKO	nAChRβ2-attpKO	W1118
686.283	698.667	576.35	472.283	1116.85
892.8	644.75	426.683	288.25	771.95
782.583	707.017	631.233	661.65	886.417
839.133	619.75	753.517	655.867	749.7
805.767	969.6	391.817	137.583	884.55
729.1	622.583	495.9	515.45	616.483
1000.88	407.467	540.167	400.917	789.283
556.15	588.267	465.867	749.483	796.267
722.6	763.367	646.167	238.367	999.683
794.767	548.85	374.25	524.25	956.65
711.483	891.217	312.117	392.5	890.667
792.75	916.317	452.783	546.333	829.233
845.067	792.55	419.433	602.717	1083.82
755.067	680.467	763.633	434.75	843.8
771.383	345.417	418.383	737.7	1025.67
855.383	714.9	653.733	571.95	715.8
831.45	725.05	639.85	415.2	1052.65
727.067	793.55	840.317	321.6	661.033
667.917	814.3	586.183	570.4	890.533
842.8	571.983	601.633	606.483	938.767
827.917	813.6	662.4	443.25	751.017
736.567	715.033	303.867	517.367	890.6
837.75	527.917	520.183	685.15	878.35
764.017	434.233	500.5	331.067	1047.85
809.5	940.517	283.25	362.517	858.1
862.583	786.717	509.433	345.883	759.95
830.033	753.65	332.65	546.3	805.85
428.95	451.833	575.667	702.017	831.9
877.983	524	527.283	426.083	720.683
908.883	579.15	584.567	619.9	517.467
822.7	806.433	640.783	419.1	777.383
840.583	766.15	137.817	847.133	882
748.75	570.783	511.55		596.117
681.817	720.883	553.1		817.783
843.85	486.567	857.867		854.633
836.583	836.217	507.317		649.283
1038.78	795.65	587.233		831.683
763.567	680.4	709.567		940.05
872.817	854.3	703.017		874.017
699.533	732.5	429.583		759.533
437.167	582.717	377.75		681.933
710.317	792.833	658.15		1130.28
780.5	712.683	527.933		738.967
660.65	643.917	615.783		991.617
900.767	537.833	596.9		934.083
960.95	518.2			784.967
910.6	725.767			842.033
682.85	389.283			856.433
