# Supplementary material for: Conditional chemoconnectomics (cCCTomics) as a strategy for efficient and conditional targeting of chemical transmission
Source: eLife journal article supplement (doi:10.7554/elife.91927), 2023-12-19
Supplement: fig3-figsupp1-data1 [file Figure 3-figure supplement 1-Source data.xlsx]

## Sheet: Sheet1
	sgRNA	Cas9.HC	Cas9.M6	Cas9.M9
Dop2R	1.08383	0.206061	0.0563373	0.0163638
	0.90076	0.21407	0.057536	0.01393
	1.01541	0.228534	0.0685346	0.0163087
DopEcR	1.03869	0.511298	0.334825	0.359987
	0.916636	0.524103	0.331281	0.339811
	1.04467	0.579144	0.368272	0.38331
CG3160	0.944514	0.0708786	0.0119206	0.019177
	0.982537	0.0673525	0.0139121	0.0208752
	1.07295	0.0816061	0.0135842	0.0205599
5-HT1A	1.07254	0.325232	0.0914692	0.0566512
	0.962885	0.319132	0.0821867	0.0534612
	0.964576	0.353634	0.0949037	0.0707779
5-HT2B	1.06608	0.132409	0.0439272	0.023394
	0.909369	0.13368	0.0432562	0.0225976
	1.02455	0.157594	0.0471327	0.027732
TrissinR	1.03772	0.193708	0.147615	0.144119
	0.92101	0.189772	0.155375	0.137308
	1.04127	0.209314	0.162886	0.166356
Dop1R1	0.928023	0.285201	0.217951	0.18276
	1.02572	0.33301	0.246789	0.209619
	1.04626	0.308726	0.228379	0.213511
CCHa2R	1.10705	0.342927	0.114991	0.0956099
	0.832381	0.357597	0.110598	0.0964586
	1.06057	0.419742	0.118647	0.138289
5-HT2A	1.04761	0.488311	0.0667521	0.0168527
	0.952395	0.512029	0.0646357	0.0164654
		0.576505	0.0704368	0.0186418
nAChRα1	1.08973	0.223999	0.108596	0.0997571
	0.907888	0.227004	0.103613	0.0877266
	1.00239	0.256949	0.114984	0.0960116
SIFaR	1.02778	0.482669	0.17998	0.0776826
	0.921947	0.40703	0.173056	0.0750817
	1.05027	0.508769	0.227392	0.0920975
nAChRβ2	0.99512	0.166866	0.119208	0.102619
	0.979002	0.171731	0.125309	0.0949795
	1.02588	0.184468	0.13607	0.103615
CNMaR	1.0937	0.138738	0.126409	0.0777649
	0.880411	0.139952	0.125819	0.0695172
	1.02589	0.16121	0.141699	0.0721858
GluRIA	1.09018	0.325147	0.0565157	0.143883
	0.762961	0.354767	0.0579266	0.138687
	1.14686	0.383432	0.0632333	0.150164
