# Supplementary material for: Conditional chemoconnectomics (cCCTomics) as a strategy for efficient and conditional targeting of chemical transmission
Source: eLife journal article supplement (doi:10.7554/elife.91927), 2023-12-19
Supplement: fig3-figsupp3-data1 [file Figure 3-figure supplement 3-Source data.xlsx]

## Sheet: Sheet1
F1 ratio	R57C10-GAL4	Cas9.M0	Cas9.M6	Cas9.M9
	0.474359	0.49375	0.556962	0.4
	0.503145	0.476471	0.559006	0.417476
	0.50303	0.532934	0.514124	0.421053
