# Supplementary material for: Conditional chemoconnectomics (cCCTomics) as a strategy for efficient and conditional targeting of chemical transmission
Source: eLife journal article supplement (doi:10.7554/elife.91927), 2023-12-19
Supplement: fig4-data1 [file Figure 4-Source data.xlsx]

## Sheet: fig 4C
	s-LNv (4)	l-LNv (4)	5th (1)	LNd (6)	LPN (3)	DN1 (17)	DN2 (2)	DN3 (35)
sNPF	100	0	0	27.17	0	0	0	0
Dh31	91	0	0	20	0	22.35	0	0
Trissin	0	0	0	30.33	0	0	0	0
ChAT	75	0	0	38.33	33.33	5.88	50	2.86
VGlut	0	30	0	19.5	0	20.59	100	6.29
GlyT	70	97	100	16.67	0	9.24	50	5.71
AstC	0	0	0	16.67	0	0	91.5	2.86
Trh	0	0	0	0	0	10.29	0	0
CCHa1	0	0	0	0	0	9.41	0	0
Nplp1	0	0	0	0	0	29.41	0	5.71
NPF	25	0	0	16.67	0	0	0	0
CNMa	0	0	0	0	0	23.53	0	2.86
DH44	0	41.75	0	50	0	29.41	83.5	4.77
ITP	0	0	0	0	0	0	0	2.86
TH	37.5	0	0	16.67	0	20.59	0	0
Proc	0	0	0	16.67	0	0	0	0
CG43795	0	0	0	0	0	0	50	0
CG32547	0	67.75	0	31	0	19.35	50	0
CG43795	0	0	0	0	0	0	50	0
CG13229	0	87.5	100	25	0	0	0	2.86
spab	0	0	0	16.67	0	0	50	0
Nmdar1	25	91	0	31.33	0	8.82	55.5	4
Dh31-R	50	85.75	100	0	0	5.88	0	0
GluRIB	0	0	0	0	0	9.18	75	2.86
nAChRα2	0	95	100	33.33	0	12.76	0	5.71
nAChRβ2	0	75	0	0	0	5.88	0	2.86
mAChR-B	33.25	83.25	0	25	0	19.88	50	0
5-HT2B	0	0	0	27	0	0	50	0
Dh44-R2	0	0	0	16.67	0	0	0	0
GABA-B-R3	0	0	0	16.67	0	0	0	0
GABA-B-R2	85.75	90.75	100	71.5	0	17.65	50	2.86
NPFR	0	0	0	16.67	0	0	0	3.26
SIFaR	0	80.25	0	33.33	0	5.88	50	3.49
FMRFaR	0	0	0	0	0	0	50	0
MsR1	0	82.25	0	16.67	33.33	0	100	0
D2R	0	0	0	16.67	0	0	0	0
PK2-R1	0	0	0	25	0	0	50	0
Oct-TyrR	0	0	0	0	0	0	0	5.71
CCHa1-R	37.5	0	0	0	0	0	0	0
Pdfr	0	28.5	0	16.67	0	13.47	50	3.8
nAChRα1	75	0	0	93.33	66.67	72.94	0	2.86
Octβ2R	0	0	0	0	0	61.76	75	7.14
CrzR	0	0	0	0	0	11.76	75	7.14
CNMaR	0	0	0	0	0	0	0	44.77
