# Supplementary material for: Conditional chemoconnectomics (cCCTomics) as a strategy for efficient and conditional targeting of chemical transmission
Source: eLife journal article supplement (doi:10.7554/elife.91927), 2023-12-19
Supplement: fig5-data1 [file Figure 5-soure data.xlsx]

## Sheet: fig5B
	Clk856>Cas9.M6			Clk856>sgRNACNMa			Clk856>Cas9.M6,sgRNACNMa			Cas9.M6,sgRNACNMa
ZT	mean	sd	n	mean	sd	n	mean	sd	n	mean	sd	n
6.5	0.038521	0.039814	46	0.036798	0.042302	42	0.024047	0.033954	45	0.038754	0.041419	47
7	0.039638	0.047498	46	0.032475	0.03575	42	0.028759	0.043213	45	0.050466	0.056235	47
7.5	0.049642	0.063203	46	0.038998	0.048798	42	0.027863	0.030692	45	0.050349	0.052887	47
8	0.047699	0.061833	46	0.058607	0.064911	42	0.040849	0.057786	45	0.057778	0.050626	47
8.5	0.069352	0.076536	46	0.054265	0.073195	42	0.066381	0.084101	45	0.08011	0.091161	47
9	0.065699	0.074236	46	0.101784	0.092582	42	0.10958	0.098202	45	0.10823	0.080397	47
9.5	0.124072	0.118737	46	0.123779	0.102929	42	0.174518	0.154342	45	0.126508	0.085863	47
10	0.134406	0.131537	46	0.178907	0.139469	42	0.267676	0.184485	45	0.152253	0.102286	47
10.5	0.217156	0.155845	46	0.251712	0.149526	42	0.36478	0.217896	45	0.243594	0.126642	47
11	0.333362	0.168199	46	0.40042	0.152005	42	0.517475	0.211602	45	0.361762	0.148424	47
11.5	0.547127	0.168466	46	0.604548	0.142171	42	0.678422	0.179837	45	0.521651	0.178386	47
12	0.733067	0.155862	46	0.697024	0.147077	42	0.789851	0.179805	45	0.664781	0.196788	47
12.5	0.91328	0.159731	46	0.890388	0.143724	42	0.914069	0.128424	45	0.914894	0.185352	47
13	0.256905	0.279824	46	0.394733	0.357582	42	0.152937	0.246011	45	0.304366	0.299982	47
13.5	0.070634	0.135579	46	0.204091	0.266462	42	0.058366	0.142006	45	0.109399	0.20279	47
14	0.024406	0.066792	46	0.067195	0.138114	42	0.022546	0.057536	45	0.030395	0.066423	47
14.5	0.017371	0.021895	46	0.027567	0.031015	42	0.010973	0.02445	45	0.016325	0.031576	47
15	0.015052	0.023116	46	0.021871	0.028908	42	0.013054	0.023299	45	0.029406	0.04898	47
15.5	0.017416	0.039165	46	0.022371	0.032625	42	0.016458	0.032593	45	0.020808	0.032358	47
16	0.016798	0.017605	46	0.028003	0.042929	42	0.017233	0.028595	45	0.025346	0.039714	47
16.5	0.020438	0.02575	46	0.049632	0.119617	42	0.032414	0.058791	45	0.032644	0.058782	47
17	0.018776	0.023992	46	0.043281	0.095832	42	0.034925	0.066191	45	0.044902	0.078034	47
17.5	0.021247	0.037084	46	0.027094	0.035722	42	0.037373	0.084149	45	0.02738	0.042704	47
18	0.020653	0.029737	46	0.024437	0.046253	42	0.021773	0.049459	45	0.030447	0.052625	47
18.5	0.019936	0.048102	46	0.036746	0.072379	42	0.046254	0.072495	45	0.02644	0.053896	47
19	0.026367	0.034186	46	0.026698	0.038811	42	0.035411	0.063638	45	0.030601	0.057299	47
19.5	0.020758	0.02858	46	0.023681	0.034171	42	0.03134	0.062728	45	0.032385	0.052853	47
20	0.035104	0.047078	46	0.034556	0.071242	42	0.047337	0.079001	45	0.028871	0.044574	47
20.5	0.02279	0.037292	46	0.026718	0.044043	42	0.041742	0.068191	45	0.030967	0.06298	47
21	0.02619	0.043026	46	0.05384	0.103636	42	0.063938	0.113697	45	0.020689	0.032379	47
21.5	0.04326	0.073189	46	0.087359	0.115535	42	0.144569	0.203387	45	0.042322	0.084604	47
22	0.061513	0.095421	46	0.097034	0.13689	42	0.241148	0.233529	45	0.046955	0.073081	47
22.5	0.083597	0.125122	46	0.111424	0.158376	42	0.359682	0.23675	45	0.064867	0.085567	47
23	0.191984	0.161662	46	0.181619	0.19899	42	0.340659	0.200558	45	0.087988	0.116305	47
23.5	0.249898	0.147696	46	0.311296	0.263486	42	0.286952	0.203901	45	0.15498	0.169842	47
24	0.261889	0.158204	46	0.411676	0.220732	42	0.273872	0.204275	45	0.248957	0.188085	47
0.5	0.754724	0.203092	46	0.867796	0.151564	42	0.661378	0.226656	45	0.711686	0.21327	47
1	0.424831	0.201361	46	0.534015	0.16549	42	0.349172	0.176965	45	0.342605	0.174503	47
1.5	0.259036	0.152424	46	0.369329	0.159461	42	0.212154	0.151562	45	0.196879	0.142	47
2	0.161226	0.126362	46	0.214113	0.163003	42	0.157062	0.120771	45	0.113715	0.105108	47
2.5	0.108793	0.091024	46	0.130157	0.10988	42	0.112786	0.116725	45	0.106755	0.066825	47
3	0.065392	0.072537	46	0.068026	0.071082	42	0.081239	0.080075	45	0.062726	0.070657	47
3.5	0.062035	0.058988	46	0.0428	0.058716	42	0.054606	0.077945	45	0.047997	0.049415	47
4	0.043102	0.052511	46	0.027743	0.039203	42	0.0441	0.057877	45	0.042316	0.051057	47
4.5	0.036223	0.036561	46	0.033471	0.043338	42	0.029893	0.045443	45	0.052396	0.052844	47
5	0.038401	0.042907	46	0.039606	0.062331	42	0.033532	0.051321	45	0.039704	0.044621	47
5.5	0.036265	0.044825	46	0.032395	0.03104	42	0.02085	0.043327	45	0.052481	0.051589	47
6	0.036818	0.032319	46	0.02529	0.03334	42	0.01802	0.026326	45	0.035707	0.0331	47

## Sheet: fig5C
Clk856>Cas9.M6	Clk856>sgRNA(CNMa)	Clk856>Cas9.M6, sgRNA(CNMa)	Cas9.M6, sgRNA(CNMa)
	-0.06405	0.078311	-0.01284
-0.0895	-0.32738	0.491053	-0.08146
-0.015		0.177343	0.00378
-0.08729	-0.05481	0.320417
-0.09272	-0.20818	-0.23153	0.024967
-0.07679	-0.13345	-0.0601	0.028552
-0.0856		-0.00129	-0.16277
-0.06756	-0.03689	0.166639	-0.26072
0.027972	0.01624	0.215982	0.009813
0.056173	0.075142	-0.02383	-0.0809
-0.11488	0.166634	0.177677	-0.15785
-0.03935	0.000543	0.198561	-0.17224
0.16385		0.084809	-0.09375
-0.03232	9.71e-05	0.103028	-0.0023
-0.08293		0.060395	-0.03668
0.010888		0.274416	-0.00715
-0.04622	0.231873
0.001017	-0.17031	0.312032	0.072121
-0.09388	-0.23352	0.310345	-0.00266
-0.10647	-0.08904	0.020265	0.043615
-0.1338	-0.18208	-0.08364	-0.06408
0.185009	0.057109	0.097105	-0.16912
-0.14242	-0.13331	0.208761	-0.00462
0.001554	-0.11684	0.118776	0.170359
-0.06733	-0.28306	-0.0678	-0.13192
-0.03844	0.008911	0.150555	-0.05656
-0.01862	-0.20433	0.147279	-0.09319
-0.08929	-0.09223	-0.00026	-0.06517
-0.04651	-0.01618	0.288587	-0.13975
-0.03295	-0.24535	0.098884	-0.10789
-0.07437	-0.16224	-0.01684	-0.00526
0.035614	-0.33327	0.077166	-0.0822
-0.00452	-0.21183	0.027907	-0.04756
-0.08385	-0.14755	0.213263	0.056314
-0.06581	0.008517	0.286477	-0.10147
-0.06247	-0.06939	0.236466	-0.09414
-0.07918	-0.20869	0.177063	-0.09614
-0.03588	-0.24305	0.404816	-0.04614
-0.14672	0.099103	-0.06902	-0.00113
-0.08163	0.054086	-0.01638	-0.0629
-0.10385		0.147988	-0.04627
0.248488	0.002001	-0.12914	-0.21435
-0.00393	0.184838	0.425446	0.0296
-0.03449	0.021012		0.030153
-0.12285	-0.08783	0.168941	0.017199
0.01116	-0.03951	0.267854	-0.02389
-0.01299	-0.13344	-0.06351	-0.0913
-0.07172	-0.20448		0.013976

## Sheet: fig5D
Clk856>Cas9.M6	Clk856>sgRNA(CNMa)	Clk856>Cas9.M6, sgRNA(CNMa)	Cas9.M6, sgRNA(CNMa)
	46.3115		104.339
149.827	102.173	54.8286	165.913
130.803		121.495	63.6364
76.8989	99.376	30.8865
158.433	6.35822	49.8352	0
71.5782	59.2943	79.06	0
116.294		154.804	21.4049
142.489	62.6553	0	46.6627
133.687	0	8.2227	0
144.192	128.653	41.1149	5.66525
154.043	105.666	0	9.05533
0	46.6509	89.3649	149.037
144.094		50.8181	139.582
156.728	0	3.64506	74.9895
103.768		0	16.867
89.8624		136.273	184.122
79.3234	64.3845	90.7751
0	64.6568		59.9461
19.8898	17.54	16.5381	34.3716
0	53.8696	2.3147	18.6456
75.8706	27.2852	45.8444	13.0877
46.2335	0	0	141.354
112.85	0	176.137	33.1604
0	109.991	58.7686	64.9294
53.0008	66.0662	102.137	4.33363
0	16.9151	0	82.967
48.993	1.35782	20.8846	56.1881
153.489	0	24.0707	49.4299
108.893	110.827	20.6696	90.2779
125.941	144.185	0	49.208
0	16.4008	119.537	125.081
135.073	80.691	36.8305	131.902
12.5188	133.891	0	167.074
20.656	53.3575	58.1143	103.475
35.9958	24.4365	59.6318	16.5614
188.844	40.432	60.6542	78.6607
69.0998	120.77	16.6706	13.9338
153.653	12.266	137.99	124.777
117.973	33.3994	112.991	74.2459
0	95.7015	28.9277	5.95642
158.071		0	36.5604
86.3948	151.791	34.8884	32.7648
63.584	35.9813	163.904	106.75
34.6554	44.0844	104.787	158.47
119.048	105.401		117.109
63.5126	0	87.8586	18.3132
100.212	73.6787	42.7571	0
50.2263	91.4579	140.612	81.3993

## Sheet: fig5E
Clk856>Cas9.M6	Clk856>sgRNA(CNMa)	Clk856>Cas9.M6, sgRNA(CNMa)	Cas9.M6, sgRNA(CNMa)
	24.3		23.8
23.8	24.8	23.8	24.3
24.3		23.8	24.8
24.3	24.3	24.3
24.3	24.3	23.8
23.8	24.8	23.8
23.8		23.8	23.8
23.8	24.3		23.8
23.8		23.8
24.3	24.3	23.8	23.8
24.8	23.8		24.3
	24.3	23.8	24.3
23.8		23.8	24.8
24.8		23.8	24.3
23.8			23.8
23.8		23.8	24.3
24.3	24.3	23.8
	24.3		23.8
23.8	23.3	23.8	23.8
	23.8	24.3	23.8
23.8	23.8	23.8	24.3
23.8			24.3
24.3		23.8	23.8
	24.3	23.8	23.8
23.8	23.8	23.8	23.8
	23.8		24.3
23.8	24.3	23.8	23.3
24.3		23.8	24.3
23.8	24.3	23.3	24.3
23.8	24.8		23.8
	23.3	23.3	24.3
23.8	23.8	22.8	24.3
23.8	23.8		24.8
23.3	24.8	23.8	23.3
23.3	22.8	24.3	23.8
24.3	23.8	23.8	23.8
23.3	24.3	23.8	22.8
24.3	23.3	24.3	23.8
23.8	23.8	23.8	24.3
	24.3	23.8	24.3
23.8			24.3
23.8	24.3	24.3	24.3
23.8	23.8	23.8	23.8
23.3	24.3	24.3	24.3
23.8	24.3		23.8
23.8		24.3	23.3
23.8	23.8	24.3
23.8	24.8	24.3	24.8

## Sheet: fig5G
w11118	CNMaKO/+	CNMaKO/KO		male
0.133443	0.241995	0.103161
0.067036	0.144474	0.032714
0.08488	-0.06077	0.038236
-0.08944	-0.00164
	0.139921	0.012004
-0.11734	-0.18054	-0.03291
0.029636	0.013314	0.206805
-0.037	0.063068	-0.0083
-0.11825	-0.25618	0.292728
-0.06371	0.046137	0.043377
0.095252	-0.22955
	0.003479	0.070066
0.042344	-0.09178	0.105149
0.080839	-0.01457	0.196061
-0.13576	0.156259	0.005599
-0.01482	-0.00418	0.25669
-0.10546	0.186527	0.077982
0.006059	0.094394	0.141698
0.072961	0.00838	0.032236
-0.27842	-0.03378	0.389329
0.017927	-0.07581	0.113496
0.046473	0.117333	0.191485
-0.08937	0.043406	0.208202
-0.11928	0.098986	0.125886
-0.02675	0.204132	0.15256
-0.26323	-0.045	0.20362
0.064233	-0.09544	0.105821
	-0.00488	0.009206
-0.13282	0.038433	0.076062
0.178856	-0.16065	0.128837
0.284515	0.269262	0.084899
-0.02944	-0.16684	0.174147
-0.12013	-0.09995	0.001551
-0.02691	0.010087	0.228708
-0.16962	-0.12888	-0.08825
	0.149252	0.087133
0.063678	-0.09583	0.011654
0.005428	0.067688	0.102363
-0.21633	-0.18902	0.057666
0.065218	-0.04826	0.241733
-0.10617
0.019116	0.218185	0.256288
-0.17081	0.104807	0.228675
0.153491	-0.09506	-0.06434
0.015735		0.236232
0.19966	0.130159
-0.12714	0.20868	0.054751
0.227802	0.008944	0.175723

## Sheet: fig5H
	w1118			CNMa -/+			CNMa -/-				female
ZT	mean	sd	n	mean	sd	n	mean	sd	n
6.5	0.457698	0.141789	47	0.320743	0.14123	46	0.295509	0.166008	45
7	0.423383	0.178069	47	0.266885	0.134822	46	0.250004	0.150446	45
7.5	0.439551	0.176499	47	0.284285	0.14869	46	0.291048	0.136113	45
8	0.43649	0.151546	47	0.297489	0.169967	46	0.30617	0.143883	45
8.5	0.441371	0.145064	47	0.313879	0.163398	46	0.326623	0.134863	45
9	0.432319	0.153637	47	0.334323	0.161187	46	0.301583	0.164668	45
9.5	0.43195	0.147201	47	0.355774	0.136115	46	0.383718	0.173982	45
10	0.448664	0.166731	47	0.402808	0.140787	46	0.465153	0.178606	45
10.5	0.489529	0.164077	47	0.425383	0.158512	46	0.546238	0.176182	45
11	0.542036	0.157701	47	0.547785	0.183424	46	0.666483	0.187496	45
11.5	0.647352	0.134714	47	0.71562	0.164204	46	0.8293	0.141093	45
12	0.765335	0.143235	47	0.798239	0.17999	46	0.879857	0.168715	45
12.5	0.84285	0.174647	47	0.825701	0.195789	46	0.704405	0.200973	45
13	0.557851	0.209604	47	0.463512	0.240543	46	0.231513	0.212004	45
13.5	0.388006	0.209612	47	0.385755	0.219441	46	0.180964	0.153928	45
14	0.245005	0.141836	47	0.272364	0.182974	46	0.138153	0.131248	45
14.5	0.180691	0.127441	47	0.17957	0.107807	46	0.10485	0.122605	45
15	0.209755	0.120162	47	0.253187	0.138738	46	0.143607	0.125647	45
15.5	0.242044	0.153057	47	0.238903	0.134437	46	0.180598	0.146134	45
16	0.218414	0.149527	47	0.201456	0.105732	46	0.155992	0.140326	45
16.5	0.194856	0.145939	47	0.190178	0.131218	46	0.156694	0.132571	45
17	0.180245	0.164562	47	0.176469	0.141246	46	0.160966	0.139668	45
17.5	0.188325	0.142562	47	0.203101	0.189241	46	0.138188	0.117705	45
18	0.14198	0.152319	47	0.13742	0.134913	46	0.158379	0.149167	45
18.5	0.117778	0.107137	47	0.143193	0.121047	46	0.1288	0.135658	45
19	0.11441	0.117077	47	0.103958	0.113797	46	0.114436	0.106476	45
19.5	0.062282	0.051074	47	0.128191	0.130416	46	0.111687	0.120026	45
20	0.074906	0.083837	47	0.105369	0.116381	46	0.134402	0.13417	45
20.5	0.063616	0.070431	47	0.143332	0.140937	46	0.171645	0.179037	45
21	0.047603	0.062741	47	0.158171	0.157374	46	0.198184	0.153547	45
21.5	0.060029	0.089444	47	0.213211	0.228167	46	0.284197	0.224076	45
22	0.031703	0.051183	47	0.196049	0.195651	46	0.406965	0.23548	45
22.5	0.015192	0.039111	47	0.220743	0.212494	46	0.506746	0.240525	45
23	0.03551	0.06924	47	0.202232	0.209933	46	0.485027	0.215298	45
23.5	0.18084	0.237555	47	0.416185	0.251272	46	0.505016	0.230155	45
24	0.395332	0.260509	47	0.619821	0.22532	46	0.493331	0.22704	45
0.5	0.835382	0.19516	47	0.746405	0.232745	46	0.564796	0.228136	45
1	0.770003	0.155154	47	0.727445	0.207968	46	0.677681	0.211861	45
1.5	0.647112	0.160796	47	0.640465	0.175915	46	0.563636	0.205812	45
2	0.61863	0.169978	47	0.527263	0.172013	46	0.432854	0.18972	45
2.5	0.645498	0.194404	47	0.497499	0.161384	46	0.43468	0.174227	45
3	0.605905	0.172158	47	0.478434	0.175345	46	0.344582	0.144071	45
3.5	0.562585	0.159967	47	0.411941	0.153433	46	0.346198	0.144057	45
4	0.546557	0.149068	47	0.416247	0.143385	46	0.322281	0.191168	45
4.5	0.540002	0.178612	47	0.372662	0.147789	46	0.284967	0.159576	45
5	0.535974	0.13826	47	0.350031	0.14941	46	0.273513	0.152413	45
5.5	0.495522	0.191024	47	0.300149	0.147683	46	0.266608	0.153287	45
6	0.450052	0.153111	47	0.318408	0.173031	46	0.264226	0.126565	45

## Sheet: fig5I
w11118	CNMaKO/+	CNMaKO/KO		female
-0.19263	-0.20399	0.210136
-0.10274	-0.07453	-0.04587
-0.06887	0.157044	0.251134
-0.21451	-0.02381	0.216367
-0.27915	0.049371	0.045173
-0.08217	0.025466
-0.09902	-2.16e-05	0.18845
-0.05687	-0.10968	0.122629
-0.19554	-0.12042	-0.0013
-0.27843	-0.27695	0.122254
-0.25494	-0.1417	-0.08659
-0.0074	0.101614	0.116338
-0.1215	-0.14451	0.267254
-0.24748	0.090159	0.274415
-0.26024	-0.43947	0.307133
-0.21029	0.235805	0.143559
-0.28998	-0.18913	0.267228
-0.30739	-0.2216	-0.03238
-0.21694	-0.18309	0.052977
-0.09916	-0.1719	-0.16342
-0.08736	-0.30609	-0.08326
-0.27031	-0.11958	0.253095
-0.12211	-0.22528	0.001213
-0.06189	-0.17828	0.161438
-0.21389	-0.09468	-0.03832
-0.07867	-0.33991	-0.00792
-0.18176	-0.10073	0.244486
-0.00613	-0.32415	0.282955
-0.21638	-0.15469	-0.24592
-0.05833	-0.09939	-0.1007
		0.186349
-0.10993	-0.18766
-0.02842	-0.09709	0.062033
-0.10231	-0.1657	0.115225
0.000316	-0.01078	0.202072
-0.11165	0.148059	0.141754
-0.24185	-0.39391	-0.07047
-0.156	-0.13883	0.260832
-0.18166	-0.07281	0.252845
-0.03815	-0.07586	0.064745
-0.04873	-0.26726	0.058799
-0.06566	-0.08858	0.003935
0.00011	-0.01852	0.136621
-0.15192	-0.21904	0.302815
-0.0626	-0.25985	0.026065
-0.17928	0.001011	0.111044
-0.01018	-0.0511	0.190528
-0.18782	-0.13717
