# Supplementary material for: Conditional chemoconnectomics (cCCTomics) as a strategy for efficient and conditional targeting of chemical transmission
Source: eLife journal article supplement (doi:10.7554/elife.91927), 2023-12-19
Supplement: fig5-figsupp1-data1 [file Figure 5-figure supplement 1-Source data.xlsx]

## Sheet: A
ZT(h)	Clk856>Cas9.M9			Clk856>sgRNApdf			Clk856>Cas9.M9, sgRNApdf			sgRNApdf, Cas9.M9			Clk856>sgRNApdfr			Clk856>Cas9.M9, sgRNApdfr			sgRNApdfr, Cas9.M9
6.5	0.036669	0.047924	46	0.04071	0.042077	23	0.07985	0.049941	23	0.039494	0.025757	24	0.059808	0.046802	23	0.067174	0.076338	23	0.045448	0.064263	24
7	0.045852	0.055159	46	0.043945	0.031046	23	0.076689	0.065379	23	0.023531	0.018514	24	0.061002	0.040397	23	0.06507	0.074601	23	0.069582	0.103433	24
7.5	0.069032	0.074429	46	0.048865	0.043047	23	0.107207	0.079958	23	0.041407	0.053191	24	0.064001	0.048485	23	0.111752	0.104956	23	0.05519	0.047419	24
8	0.073622	0.065573	46	0.045356	0.033403	23	0.098084	0.082705	23	0.043937	0.04151	24	0.073294	0.03824	23	0.101107	0.076162	23	0.1069	0.112751	24
8.5	0.085012	0.089568	46	0.072171	0.059545	23	0.196415	0.104486	23	0.075309	0.077826	24	0.094501	0.061949	23	0.198296	0.126068	23	0.186388	0.113131	24
9	0.129795	0.086088	46	0.076359	0.056332	23	0.319155	0.145039	23	0.128489	0.113422	24	0.108914	0.053324	23	0.290094	0.128436	23	0.237696	0.121243	24
9.5	0.148405	0.082476	46	0.113218	0.071923	23	0.461074	0.209903	23	0.157067	0.100352	24	0.141442	0.084571	23	0.358069	0.175289	23	0.343475	0.177009	24
10	0.213584	0.130027	46	0.136753	0.074682	23	0.535828	0.202062	23	0.171966	0.115911	24	0.188001	0.090616	23	0.463048	0.182766	23	0.395177	0.131855	24
10.5	0.310723	0.131999	46	0.184623	0.084883	23	0.574893	0.220424	23	0.247585	0.093371	24	0.235362	0.091686	23	0.507123	0.179059	23	0.443862	0.180524	24
11	0.438295	0.143221	46	0.290674	0.099315	23	0.637639	0.207724	23	0.393936	0.12848	24	0.370086	0.103584	23	0.533132	0.153436	23	0.509066	0.154146	24
11.5	0.604217	0.136967	46	0.51043	0.124084	23	0.636266	0.171031	23	0.508612	0.124907	24	0.514685	0.113309	23	0.547094	0.134615	23	0.552312	0.181227	24
12	0.71194	0.141715	46	0.711734	0.113722	23	0.656408	0.135507	23	0.624068	0.142363	24	0.641828	0.120213	23	0.598871	0.164457	23	0.580711	0.184597	24
12.5	0.96581	0.085561	46	0.987325	0.032844	23	0.967675	0.085246	23	0.991361	0.029795	24	0.984536	0.05167	23	0.969682	0.087764	23	0.954137	0.178597	24
13	0.683534	0.230951	46	0.586276	0.33359	23	0.458883	0.194681	23	0.560603	0.215673	24	0.560347	0.249223	23	0.569249	0.303058	23	0.531017	0.269557	24
13.5	0.381411	0.274511	46	0.289713	0.321464	23	0.227347	0.12379	23	0.301816	0.208023	24	0.217908	0.201241	23	0.321147	0.246855	23	0.324976	0.241058	24
14	0.170098	0.196115	46	0.050123	0.068449	23	0.138233	0.092204	23	0.101131	0.086956	24	0.050782	0.049794	23	0.245818	0.177436	23	0.201318	0.170145	24
14.5	0.128989	0.185599	46	0.033802	0.046853	23	0.118428	0.091418	23	0.04702	0.033014	24	0.029044	0.037345	23	0.157406	0.150405	23	0.130474	0.099285	24
15	0.089231	0.134805	46	0.043017	0.061397	23	0.145954	0.129564	23	0.064042	0.057495	24	0.055665	0.048285	23	0.135698	0.112249	23	0.129458	0.127202	24
15.5	0.112604	0.136359	46	0.036072	0.042768	23	0.133085	0.119698	23	0.076911	0.109501	24	0.067392	0.057436	23	0.216808	0.132262	23	0.163518	0.162094	24
16	0.109879	0.1244	46	0.058761	0.071893	23	0.170426	0.109889	23	0.055019	0.055917	24	0.061475	0.068425	23	0.191966	0.147111	23	0.157373	0.124733	24
16.5	0.091704	0.090032	46	0.030987	0.023088	23	0.147342	0.114659	23	0.043723	0.037861	24	0.068656	0.10075	23	0.181928	0.118104	23	0.203185	0.180886	24
17	0.095314	0.086724	46	0.038147	0.058576	23	0.129119	0.110285	23	0.061779	0.067982	24	0.057074	0.04709	23	0.210524	0.147938	23	0.163463	0.141516	24
17.5	0.11116	0.11896	46	0.042154	0.051677	23	0.190874	0.151417	23	0.068664	0.066256	24	0.047218	0.051128	23	0.212385	0.155918	23	0.16547	0.114784	24
18	0.100064	0.093044	46	0.071322	0.087873	23	0.186755	0.134062	23	0.07843	0.087819	24	0.051794	0.046205	23	0.177129	0.152686	23	0.116173	0.087592	24
18.5	0.117533	0.112063	46	0.057322	0.09097	23	0.236787	0.193918	23	0.083003	0.095904	24	0.083403	0.076725	23	0.183075	0.168012	23	0.131577	0.115227	24
19	0.085964	0.083438	46	0.041683	0.029646	23	0.221191	0.127837	23	0.072334	0.067417	24	0.050682	0.050839	23	0.145528	0.120824	23	0.150736	0.114269	24
19.5	0.107049	0.106535	46	0.038193	0.033014	23	0.193259	0.148759	23	0.075897	0.082442	24	0.045614	0.04976	23	0.199476	0.14606	23	0.140472	0.101378	24
20	0.113784	0.107226	46	0.058178	0.076678	23	0.160389	0.148766	23	0.069165	0.057593	24	0.083976	0.122268	23	0.206492	0.161338	23	0.112387	0.090441	24
20.5	0.140648	0.126079	46	0.077262	0.079886	23	0.124628	0.102338	23	0.072804	0.08726	24	0.104766	0.112683	23	0.14678	0.124871	23	0.160886	0.148175	24
21	0.15722	0.11173	46	0.135458	0.179353	23	0.142859	0.179339	23	0.07252	0.071012	24	0.129002	0.184083	23	0.167467	0.096698	23	0.117354	0.093164	24
21.5	0.257277	0.165995	46	0.159766	0.239253	23	0.153056	0.152863	23	0.081705	0.094936	24	0.165792	0.213253	23	0.118414	0.098149	23	0.169659	0.152928	24
22	0.405992	0.190918	46	0.155306	0.188545	23	0.132484	0.100158	23	0.145605	0.117859	24	0.177064	0.207258	23	0.178183	0.129451	23	0.203848	0.165624	24
22.5	0.460181	0.207592	46	0.179394	0.153134	23	0.157634	0.135021	23	0.164895	0.146777	24	0.235422	0.183587	23	0.281772	0.173739	23	0.222585	0.163805	24
23	0.462216	0.173191	46	0.285882	0.194528	23	0.249358	0.176466	23	0.197124	0.113743	24	0.399657	0.230379	23	0.287709	0.222898	23	0.236167	0.172896	24
23.5	0.519779	0.174256	46	0.345972	0.190202	23	0.337765	0.18296	23	0.279308	0.151046	24	0.45104	0.250714	23	0.327083	0.18343	23	0.285615	0.172241	24
24	0.530502	0.174876	46	0.454838	0.168264	23	0.329411	0.18374	23	0.320194	0.129454	24	0.534371	0.219681	23	0.366365	0.148129	23	0.349227	0.192195	24
0.5	0.637919	0.169395	46	0.723495	0.152467	23	0.399359	0.230344	23	0.499714	0.218353	24	0.665909	0.195995	23	0.400943	0.223153	23	0.320399	0.216246	24
1	0.425833	0.177631	46	0.384676	0.172693	23	0.238683	0.179921	23	0.206246	0.180945	24	0.414709	0.168778	23	0.192373	0.16636	23	0.136209	0.108893	24
1.5	0.281812	0.17546	46	0.256837	0.129828	23	0.124249	0.089409	23	0.109378	0.108719	24	0.286732	0.126839	23	0.119395	0.074131	23	0.092493	0.086741	24
2	0.194649	0.134382	46	0.158432	0.11993	23	0.100149	0.087872	23	0.063724	0.066165	24	0.203593	0.11423	23	0.111596	0.12475	23	0.05901	0.054226	24
2.5	0.142547	0.116055	46	0.109076	0.079308	23	0.098122	0.080972	23	0.046455	0.052923	24	0.160501	0.092363	23	0.130221	0.121436	23	0.083524	0.104867	24
3	0.102907	0.099305	46	0.082529	0.060522	23	0.099604	0.085878	23	0.038714	0.044181	24	0.127893	0.087576	23	0.10502	0.082302	23	0.05073	0.06713	24
3.5	0.107502	0.106947	46	0.059766	0.050211	23	0.080236	0.063949	23	0.025547	0.030529	24	0.09849	0.067651	23	0.118932	0.138008	23	0.059989	0.106123	24
4	0.063123	0.065859	46	0.06677	0.061631	23	0.093318	0.08255	23	0.029003	0.024191	24	0.095574	0.058474	23	0.097078	0.06693	23	0.039265	0.035443	24
4.5	0.074747	0.074442	46	0.04764	0.035985	23	0.092659	0.075836	23	0.029755	0.027268	24	0.0581	0.037629	23	0.086333	0.087081	23	0.058316	0.070684	24
5	0.071405	0.096407	46	0.056851	0.050496	23	0.051132	0.037657	23	0.028144	0.024626	24	0.075984	0.050919	23	0.086765	0.088291	23	0.05776	0.06817	24
5.5	0.039546	0.034	46	0.052382	0.04528	23	0.090373	0.076816	23	0.03732	0.023406	24	0.064465	0.047711	23	0.066833	0.064766	23	0.06526	0.114244	24
6	0.052556	0.064157	46	0.048742	0.033903	23	0.086169	0.075161	23	0.027793	0.044843	24	0.057045	0.033146	23	0.073664	0.069803	23	0.055272	0.064648	24

## Sheet: B
Clk856_GAL4-UAS_Cas9.M9	-	Clk856_GAL4-UAS_sgRNA(Dh31)	Clk856_GAL4-UAS_Cas9.M9-UAS_sgRNA(Dh31)	UAS_sgRNA(Dh31)-UAS_Cas9.M9	-	Clk856_GAL4-UAS_sgRNA(Dh44)	Clk856_GAL4-UAS_Cas9.M9-UAS_sgRNA(Dh44)	UAS_sgRNA(Dh44)-UAS_Cas9.M9	-	Clk856_GAL4-UAS_sgRNA(pdf)	Clk856_GAL4-UAS_Cas9.M9-UAS_sgRNA(pdf)	UAS_sgRNA(pdf)-UAS_Cas9.M9	-	Clk856_GAL4-UAS_sgRNA(pdfr)	Clk856_GAL4-UAS_Cas9.M9-UAS_sgRNA(pdfr)	UAS_sgRNA(pdfr)-UAS_Cas9.M9
0.438495		0.477522	0.451938	-0.250979		0.307436	0.240857	0.356914		0.338476	0.230865	0.149172			0.051831	0.208355
		0.153146	0.306866	0.216185		0.420709	0.260438	0.296437			0.134398	0.324285		0.409756	0.0691423	0.052544
0.354082		0.33526	0.49079	0.486224		0.422597		0.426655		0.154342	-0.0978135	-0.0213483		0.230772	0.430185	0.0410377
		0.418225	0.234562	-0.058635		0.205874	0.152875	0.154541		0.380202		0.107904		0.363519	-0.0219063	0.0370957
0.354132		0.3826	0.365809	0.140491		0.00750471	0.112089	0.26313		0.349825	0.0936498	0.305498			0.131876	0.248744
0.173916		0.362802	0.28805	0.368996		0.378878	0.293185	0.260394		0.231414	-0.0275932	0.189415		0.395929	0.411088	0.143833
0.347675		0.413036		0.0245562		0.379101				0.416501	0.203002	0.397739		0.369479	0.175028	0.226736
0.358644		0.446187	0.200705	0.13391		0.295144	0.20082	0.269766		0.321693	-0.192474	0.238095		0.233119	0.208083	0.186282
0.307541		0.497521	-0.00925547	0.252449		0.397325	0.304532	0.338497		0.177186	0.157619	0.321815		0.485013		0.146735
0.215858		0.412181	0.256183	0.488963		0.314095	0.34425	0.20281		0.30911	0.209747	0.145161			-0.110942	0.197011
0.443946		0.271067	0.325763			0.283722	0.379383	0.165287		0.409891	0.180982	0.384681		0.146648	0.265184	0.0112285
0.283539		0.405293	-0.0962508	0.0921805		0.268726	0.205673	0.169922		0.303316	-0.0540351	0.361498		0.276665	-0.0316987	0.243806
0.194997		0.498434	0.174737	0.354545		0.223093	0.272307	0.279418		0.273678	-0.00742161	0.215706		0.425905	-0.0365192	-0.0737443
0.238667		0.233545		0.430924		0.213764	0.287668	0.281752		0.382718		0.188608		0.402565	0.0458709	0.0718881
0.326338		0.399039	0.28234	0.191422		0.313112	0.119748	0.195784			-0.0968037	0.122943		0.329409	0.0402708
0.318606		0.250447	0.119679	-0.0040982		0.417202	0.227714	0.287881		0.432545	0.0228453	0.191041		0.207233	0.0847526	0.153596
0.169198		0.436929	0.204129	0.275989		0.304462	0.322281	0.242512		0.349136	-0.149745	0.169231		0.414759	0.135847	0.256569
0.26139		0.39615		0.155477		0.36044	0.342213	0.454057		0.362451	0.286453			0.274835		0.0561137
0.293555		0.32277	0.256513	0.119454		0.221444	0.178179			0.176868	0.10695	0.272864		0.270779	0.0755379	0.108312
0.231737		0.195262	0.358425	0.3974		0.297213	0.234483	0.304004		0.311137	0.205246	0.305427		0.434978	0.12502	0.00264151
0.315255		0.24937	0.359777	-0.030039		0.380947	0.291093	0.375427			0.0833949	0.325971		0.306712	-0.0050539	0.157643
0.406827		0.429586	0.304351	0.283374		0.166679	0.184133	0.221763		0.409852	0.00312652	0.219662		0.390045	0.0919243	0.248618
0.332893		0.337289	0.124652	0.03988		0.368764	0.25565	0.424963		0.308995	0.196677	0.242303		0.273962	0.219524	0.308038
0.33955		0.333083		0.000486377		0.336766	0.426064	0.433186			0.150025	0.125767		0.311961	0.338206	0.120337
0.331312			0.399192			0.271437
0.351349			0.127432			0.246592	0.286667
0.413656						0.214688
			0.180388			0.287888	0.40732
0.317546			0.365907			0.0945723	0.369354
0.354377			0.388251			0.337669	0.336294
0.245784			0.295596			0.162469	0.421178
0.275017			0.359316				0.401241
0.399615			0.32082			0.402117	0.215597
0.344987			0.347979			0.259896	0.357485
0.23846			0.428973			0.281448	0.335489
0.2647			0.322116			0.233719	0.249571
0.207111			0.426149			0.377887	0.338077
			0.409428			0.295358
0.342844			0.00807858			0.0571068	0.42165
0.312419			0.303386			0.370314	0.242536
0.415516			0.186143			0.224446	0.290375
0.290047			0.210458			0.163103
			0.242843			0.128049	0.295354
0.340171			0.241744			0.393449	0.266357
0.281744						0.277006
0.306704			0.258124			0.377822	0.21166
0.332509			-0.257287			0.269315	0.260104
0.296698			0.238259			0.229528	0.354611

## Sheet: C
Clk856_GAL4-UAS_Cas9.M9	-	Clk856_GAL4-UAS_sgRNA(Dh31)	Clk856_GAL4-UAS_Cas9.M9-UAS_sgRNA(Dh31)	UAS_sgRNA(Dh31)-UAS_Cas9.M9	-	Clk856_GAL4-UAS_sgRNA(Dh44)	Clk856_GAL4-UAS_Cas9.M9-UAS_sgRNA(Dh44)	UAS_sgRNA(Dh44)-UAS_Cas9.M9	-	Clk856_GAL4-UAS_sgRNA(pdf)	Clk856_GAL4-UAS_Cas9.M9-UAS_sgRNA(pdf)	UAS_sgRNA(pdf)-UAS_Cas9.M9	-	Clk856_GAL4-UAS_sgRNA(pdfr)	Clk856_GAL4-UAS_Cas9.M9-UAS_sgRNA(pdfr)	UAS_sgRNA(pdfr)-UAS_Cas9.M9
-0.0980155		-0.155771	0.118247	-0.125106		-0.0653198	-0.0319509	-0.057842		-0.137938	-0.142496	-0.139428			0.0102588	-0.0320192
		-0.1581	-0.226309	0.0463382		-0.0393261	-0.214757	-0.0659475			0.156557	-0.132978		-0.111021	0.0480009	0.00680229
-0.00961135		-0.134175	-0.186219	-0.105994		-0.13691		-0.0793559		-0.164303	0.110556	-0.0828854		-0.102914	-0.117628	0.108254
		-0.124437	-0.163762	-0.166672		-0.0537395	-0.157542	-0.0218455		-0.151792		-0.108567		-0.109683	0.0586782	0.0110975
-0.103251		-0.123156	0.00587061	-0.0335727		-0.052358	-0.214395	-0.0767518		-0.175338	0.135036	-0.251838			0.0233803	-0.0151528
-0.0223429		-0.168789	-0.221425	-0.0939779		-0.0975494	0.00905598	-0.0798618		-0.161257	0.0948708	0.032335		-0.122249	0.0100409	0.0320648
-0.149238		-0.195494		-0.187986		-0.172366				-0.090416	0.181183	-0.0574275		-0.125554	0.0588277	0.0573965
-0.0863311		-0.127884	-0.0213699	-0.192769		-0.109124	-0.0574302	-0.030463		-0.12328	0.130554	-0.0962135		-0.0151551	0.0804376	0.061098
-0.0864766		-0.0849071	-0.112864	-0.109231		-0.135393	-0.114149	-0.0300357		-0.149164	0.0798193	-0.0450503		-0.131777		-0.032497
-0.0203635		-0.119931	-0.0186245	-0.137675		-0.0715564	-0.123147	-0.11875		-0.117992	-0.144685	-0.107868			0.0654155	0.0268799
-0.0521943		-0.188084	-0.189295			-0.132826	-0.149226	-0.0636471		-0.112894	-0.103739	-0.0856365		-0.0908089	-0.0481845	0.0374026
-0.0924867		-0.168459	-0.162759	-0.0916957		-0.0632624	-0.0718922	-0.103788		-0.209104	0.120006	-0.103008		-0.0957322	0.0444514	0.0465677
-0.0450128		-0.119579	-0.185706	-0.0414031		-0.153041	-0.0970498	-0.0879217		-0.231648	0.131376	-0.0499644		-0.176713	0.0824388	-0.040697
-0.0298678		-0.202496		-0.0741422		-0.101193	-0.076165	-0.0217086		-0.100908		-0.102964		-0.0637883	0.050696	0.0109608
0.0105682		-0.21829	-0.210086	-0.16527		-0.208873	-0.0617983	-0.0595817			0.087599	-0.174716		-0.110995	0.0365059
-0.112928		-0.179609	-0.132164	-0.109783		-0.16955	-0.195303	-0.112396		-0.201275	0.0965325	-0.0433429		-0.0857076	0.0538271	0.0150083
-0.133282		-0.173172	-0.0714792	-0.0560299		-0.0752153	-0.168253	-0.149932		-0.131417	0.105265	-0.0623839		-0.16059	0.0367877	0.055603
-0.0457057		-0.225642		-0.118014		-0.136876	-0.161846	-0.169469		-0.172122	-0.131598			-0.110204		-0.0108585
-0.155839		-0.159187	-0.108322	-0.13993		-0.172743	-0.0813725			-0.151035	0.211573	-0.0468852		-0.14874	0.0802713	-0.0229109
-0.137853		-0.112251	-0.0958735	-0.0855682		-0.156084	-0.139318	-0.0617423		-0.165352	0.138087	-0.0691113		-0.0860609	0.141793	-0.0179571
-0.157475		-0.236143	-0.0641721	-0.127024		-0.14577	-0.0934687	-0.059992			0.0235811	-0.124775		-0.0536652	0.137224	0.00707057
-0.148585		-0.121601	-0.0374033	-0.0388134		-0.163042	-0.0348483	0.05948		-0.127532	0.116208	-1.39941e-05		-0.0374226	0.0465047	0.0419662
-0.109745		-0.125152	-0.141186	-0.210991		-0.109272	-0.0209633	-0.0525994		-0.162192	0.198371	-0.0940258		-0.107209	0.162601	0.0471946
-0.1131		-0.163237		-0.200252		-0.0931728	-0.0785507	-0.144839			0.0943977	0.00894022		-0.0783585	0.0287578	0.00678027
-0.0654401			-0.130244			-0.0086591
-0.0964953			-0.247442			-0.114544	-0.125796
0.00116325						-0.15481
			-0.08498			-0.0822939	-0.172451
-0.0200064			-0.133186			-0.121278	-0.0890627
0.0100143			-0.30394			-0.186226	-0.112992
-0.150617			-0.134369			-0.0374593	-0.110391
-0.0919761			-0.0285706				-0.24582
-0.138496			-0.071494			-0.125514	-0.0592587
-0.255383			-0.0370474			-0.0846116	-0.229324
-0.0798961			-0.124734			-0.11826	-0.225619
-0.0678588			-0.101775			-0.135841	-0.141506
-0.12012			-0.0691122			-0.104544	-0.0939846
			-0.216953			-0.0873154
-0.114197			-0.0518268			-0.129911	-0.204815
-0.191452			-0.0740388			-0.116238	-0.112127
-0.0253574			0.00310097			-0.191615	-0.108587
-0.049314			-0.0637317			-0.0839054
			-0.00432397			-0.130985	-0.0656755
-0.1246			-0.104338			-0.106342	-0.0633972
-0.104806						-0.17723
-0.112257			-0.00441347			-0.0848127	-0.136659
-0.0968798			-0.217867			-0.200294	-0.032725
-0.0580355			-0.042706			-0.11306	-0.227197

## Sheet: D
Clk856_GAL4-UAS_Cas9.M9	-	Clk856_GAL4-UAS_sgRNA(Dh31)	Clk856_GAL4-UAS_Cas9.M9-UAS_sgRNA(Dh31)	UAS_sgRNA(Dh31)-UAS_Cas9.M9	-	Clk856_GAL4-UAS_sgRNA(Dh44)	Clk856_GAL4-UAS_Cas9.M9-UAS_sgRNA(Dh44)	UAS_sgRNA(Dh44)-UAS_Cas9.M9	-	Clk856_GAL4-UAS_sgRNA(pdf)	Clk856_GAL4-UAS_Cas9.M9-UAS_sgRNA(pdf)	UAS_sgRNA(pdf)-UAS_Cas9.M9	-	Clk856_GAL4-UAS_sgRNA(pdfr)	Clk856_GAL4-UAS_Cas9.M9-UAS_sgRNA(pdfr)	UAS_sgRNA(pdfr)-UAS_Cas9.M9
100.305		0	118.707	111.394		92.977	2.61143	11.3034		160.284	0	22.9253			0	0
		71.8992	90.7579	44.5073		92.5242	0	17.4266			0	0		124.494	18.7958	16.5044
65.3936		14.0177	150.144	32.4997		101.096		28.3012		68.6987	0	48.8998		0	98.9032	66.0744
		51.6691	94.8159	44.3629		68.6519	6.0816	128.669		42.1661		102.987		135.097	0	0
118.707		13.9841	14.0441	53.883		0	0	72.8953		123.338	40.1017	128.5			0	71.2034
30.1286		94.6149	143.861	36.4128		68.1057	43.5336	0		55.339	0	25.1715		51.0409	136.229	86.5455
113.086		111.116		39.9855		48.0746				108.136	0	0		55.0473	0	35.7461
154.287		35.0133	35.1332	0		53.98	47.1605	118.111		104.08	0	0		91.7133	0	0
48.2237		61.0945	125.486	30.9095		154.201	9.0719	43.1992		145.188	2.76934	135.604		98.7201		0
53.1596		69.5344	58.007	75.6354		133.315	22.0753	10.9775		37.1691	25.1038	0			0	81.3227
156.972		87.5802	17.7409			102.107	40.238	0		27.953	10.717	63.8557		118.384	135.656	89.1507
108.874		53.7216	38.4761	124.122		50.7163	41.0343	73.1754		126.472	0	0		164.611	0	15.8698
0		111.965	81.8581	29.9373		135.693	26.5008	50.8396		129.9	14.1137	49.7114		96.6637	0	7.6573
62.377		24.5676		81.9197		128.679	62.3889	0		85.7493		0		119.926	0	38.4353
61.0347		4.73377	153.99	108.778		95.985	89.0702	41.3144			0	123.613		128.06	0
14.7584		55.3735	122.046	134.434		78.5295	56.9862	88.8724		134.669	0	0		73.1748	54.8124	0
110.529		87.9803	158.72	118.455		95.1693	46.4413	44.9833		116.652	0	155.222		62.5933	0	69.4724
72.9004		66.0646		90.0883		75.1962	0	14.5074		156.48	39.7718			125.332		69.464
128.745		75.1896	127.314	70.0203		88.3517	12.4391			32.5711	0	0		0	0	46.194
108.668		25.4019	65.5296	51.5676		94.7486	3.32899	60.1265		84.9972	0	82.2871		136.793	0	0
125.614		132.01	95.047	53.2375		56.5138	33.8807	19.4892			0	65.031		86.3693	0	0
109.636		5.29718	82.3896	156.336		152.726	0	49.4483		141.211	0	119.714		80.9239	27.8395	71.9794
133.164		78.9626	59.011	17.3789		179.134	54.2026	23.0744		0	0	43.7754		11.577	0	78.2372
121.66		62.0656		84.0744		108.959	10.0767	102.055			0	0		92.4235	101.663	111.29
68.2368			27.905			43.5258
111.728			129.246			126.084	41.2289
104.099						91.7714
			0			59.9407	37.9335
37.6363			128.628			88.1912	1.98992
104.794			37.3861			112.808	49.1342
113.345			145.009			112.435	14.3773
63.8686			136.073				53.6367
0			169.988			36.4239	89.3613
136.51			45.6079			175.088	33.6738
90.0124			115.865			127.801	24.8559
142.441			61.9439			76.6128	67.4802
77.946			26.4228			100.451	106.699
			103.209			127.496
64.5748			0			41.8016	68.463
75.9512			169.435			119.17	53.8382
101.818			57.3009			83.0845	76.843
35.3153			0.72094			137.552
			64.2402			74.0178	109.488
119.683			73.2975			124.834	21.6591
0						100.228
103.897			62.3178			133.851	0
138.721			69.5115			141.777	129.763
0			47.5529			33.7976	76.0834
