# Supplementary material for: Conditional chemoconnectomics (cCCTomics) as a strategy for efficient and conditional targeting of chemical transmission
Source: eLife journal article supplement (doi:10.7554/elife.91927), 2023-12-19
Supplement: fig5-figsupp2-data1 [file Figure 5-figure supplement 2-Source data.xlsx]

## Sheet: A
Clk856-GAL4_UAS-Cas9.M6		UAS-sgRNA(mAChR-B)_Clk856-GAL4	UAS-sgRNA(mAChR-B)_Clk856-GAL4_UAS-Cas9.M6	UAS-sgRNA(mAChR-B)_UAS-Cas9.M6		UAS-sgRNA(MsR1)_Clk856-GAL4	UAS-sgRNA(MsR1)_Clk856-GAL4_UAS-Cas9.M6	UAS-sgRNA(MsR1)_UAS-Cas9.M6		UAS-sgRNA(nAChRα1)_Clk856-GAL4	UAS-sgRNA(nAChRα1)_Clk856-GAL4_UAS-Cas9.M6	UAS-sgRNA(nAChRα1)_UAS-Cas9.M6		UAS-sgRNA(CNMa)_Clk856-GAL4	UAS-sgRNA(CNMa)_Clk856-GAL4_UAS-Cas9.M6	UAS-sgRNA(CNMa)_UAS-Cas9.M6
		-0.00399232	-0.0684205	0.15254		0.0395345	-0.0625142	-0.324248		-0.134138	-0.106251	-0.119004		-0.132221	-0.0365566	0.0380378
0.0233763		0.0395259	-0.208974	0.00507157		-0.160678	-0.108319	-0.154425			0.153483	-0.140466		0.161633	0.222548	-0.16222
-0.11836		-0.00851004	-0.0245256	-0.0975435		-0.167918	0.231751	0.101379		0.0962419	-0.0717652	-0.126375		0.104841	0.19973	0.0983651
-0.159278			0.105919	-0.163362		-0.0722231	0.012591	0.0468296		0.321887	0.0380594	-0.075022		-0.128128		-0.320896
-0.117742		-0.0933508	-0.201508	-0.253985		-0.0149543	-0.103864	-0.177643		-0.112445	-0.129855	0.177858		-0.0624919	0.0407219	-0.256429
-0.330196		0.032986	-0.140934	-0.0296883		0.0429962	-0.311083	-0.364837		0.101834	-0.00443071	-0.150848		-0.0163524	0.248637	-0.201283
-0.00781765		0.191812	-0.0956955	0.0544986		-0.0414077	-0.036412	0.114763		-0.0121736	-0.159579	0.0215153		0.00335291	0.435457	-0.255268
		-0.00205383	-0.0385861	-0.154784		-0.0587778	0.155688	0.0444868		0.0958004	0.0124772	0.0498243		-0.0109047	0.332819	-0.265498
-0.0187445		-0.13028	-0.215439	-0.0698215			0.18669	0.1645		-0.0344372	-0.0176743	0.390873		-0.0225957	0.174241	-0.307453
		-0.17986	-0.0508373	0.134982		-0.124491	0.177928	-0.165486		-0.0165825	-0.011787	-0.0539435		-0.0408149	0.302222	-0.208802
-0.075135		-0.0699683	-0.110175	0.118924		0.178495	0.178371	0.0269519		-0.229176	0.0766482	-0.055363		0.00665811		-0.189678
-0.244858		0.272714	-0.201231	-0.200728		-0.186382	-0.162869			0.0671212	-0.152454	-0.136148		-0.0168379	0.263101	-0.112465
-0.20462		-0.0624216	0.0434913	-0.0502124		0.114255	-0.0835467	-0.1261UAS-sgRNA(mAChR-B)8		0.0601374	-0.0353437	-0.188279			-0.188038	-0.0784324
-0.101369		0.0426752	-0.197072	-0.0758506		-0.100863	-0.0350967	0.169701		0.117542	-0.1716	0.0180928		0.166939	-0.0497893	-0.229429
0.155564			-0.185154	0.00134141		0.0341548	-0.0184369	0.0670342		0.164084	-0.0862819	-0.141124		-0.0379279	0.30332	0.234452
0.102433		-0.00300919	-0.198523	0.0260897		0.216591	0.0228891	0.0993684		0.0382431	-0.0106834	0.231046			0.179029	0.0285395
-0.064808		0.0709549	-0.107883	-0.0287051		0.0671133	0.00283993	0.126172			-0.0902018	0.0823693		0.0396983	0.0262501	-0.218518
-0.126038		-0.0978342	-0.111075	-0.155921		0	-0.00412977	0.0999833		-0.00727683	0.11227	-0.0180421		-0.103777	0.00827919	-0.229796
-0.123784		0.0301523	0.349603	-0.135773		-0.00104237	-0.180741	0.0534216		-0.104588	-0.070427	0.00487409			0.273534	0.000284836
0.187624		0.0421339	-0.120082	-0.0199045		-0.0961686	-0.0631136	0.158577		0.149279	-0.133304	0.277418		0.00763372	0.0240928	-0.153285
0.020198		-0.0776693	-0.262565	-0.00164094		-0.0219484	-0.177598	-0.40382		-0.104372	0.116255	-0.201712		-0.0141098		-0.019886
0.0641291		0.259233	-0.124096			-0.136107	0.0714387	0.100806		0.0744272		-0.179623		0.165827	-0.221087	-0.197177
-0.0283847		0.227645	-0.263087	-0.0685054		0.0268996	-0.0638855	0.0514146		0.0748131	-0.0312053	0.144052		-0.0207799	-0.00705089	-0.0155663
		0.0294258	-0.276465	0.180582		0.0706562	-0.0771216	0.103283		0.0792326	0.0161307	-0.258691		0.0717028	0.0675392	-0.209457

## Sheet: B
male	Clk856>Cas9.M9			Clk856>sgRNACNMa			Clk856>Cas9.M9,sgRNACNMa			Cas9.M9,sgRNACNMa
ZT	mean	sd	n	mean	sd	n	mean	sd	n	mean	sd	n
6.5	0.0431809	0.0534423	46	0.0331078	0.0380906	47	0.0283521	0.0319625	46	0.0500046	0.0584374	46
7	0.0653641	0.0611604	46	0.046889	0.0523867	47	0.0268104	0.0279981	46	0.0507602	0.0640551	46
7.5	0.0559266	0.0568244	46	0.0533975	0.0549081	47	0.0331689	0.0291379	46	0.0572564	0.0628506	46
8	0.0780598	0.0624614	46	0.0541678	0.0484578	47	0.0477492	0.0476146	46	0.079783	0.0808464	46
8.5	0.0978618	0.0810179	46	0.067872	0.0712447	47	0.0677439	0.0741009	46	0.0996677	0.0885568	46
9	0.129738	0.109969	46	0.0926499	0.0701657	47	0.0972067	0.083679	46	0.117636	0.0918278	46
9.5	0.176677	0.106676	46	0.114395	0.0809687	47	0.147133	0.125844	46	0.162455	0.103742	46
10	0.226806	0.120912	46	0.165128	0.096981	47	0.199791	0.142344	46	0.212514	0.106578	46
10.5	0.312899	0.119061	46	0.207034	0.117648	47	0.304843	0.16778	46	0.270695	0.112674	46
11	0.42177	0.114839	46	0.341574	0.128446	47	0.434267	0.163541	46	0.409543	0.152773	46
11.5	0.53363	0.123618	46	0.497305	0.14515	47	0.56991	0.192309	46	0.517113	0.151978	46
12	0.645114	0.150231	46	0.66567	0.131213	47	0.643564	0.219397	46	0.641589	0.172033	46
12.5	0.957693	0.121443	46	0.93294	0.153764	47	0.906332	0.225208	46	0.969662	0.0725107	46
13	0.554459	0.26934	46	0.452051	0.306014	47	0.517319	0.320646	46	0.577398	0.333679	46
13.5	0.307107	0.261146	46	0.21503	0.264071	47	0.233318	0.242905	46	0.34699	0.298567	46
14	0.14941	0.154022	46	0.114596	0.161255	47	0.105558	0.172923	46	0.117492	0.170328	46
14.5	0.0975956	0.101337	46	0.066357	0.0764441	47	0.0775718	0.126488	46	0.0412447	0.0615998	46
15	0.101637	0.104065	46	0.057588	0.0528609	47	0.0690765	0.0778351	46	0.0255892	0.0335188	46
15.5	0.0797156	0.0736067	46	0.0421124	0.0421962	47	0.0667089	0.0851868	46	0.0296214	0.0322353	46
16	0.0763143	0.0747794	46	0.0809889	0.0888875	47	0.0681452	0.0799826	46	0.0286821	0.0306717	46
16.5	0.0945491	0.103313	46	0.0521575	0.0554468	47	0.0801419	0.107467	46	0.05329	0.0748341	46
17	0.106159	0.125957	46	0.0655182	0.0699058	47	0.114301	0.128154	46	0.0581089	0.0836815	46
17.5	0.107819	0.114565	46	0.0570989	0.0433114	47	0.129831	0.151174	46	0.0426284	0.0463457	46
18	0.0911456	0.100466	46	0.0533984	0.0670785	47	0.110401	0.147665	46	0.040765	0.0573627	46
18.5	0.0885722	0.0895329	46	0.0583808	0.0561559	47	0.0841692	0.10215	46	0.055744	0.0711768	46
19	0.0775886	0.0802042	46	0.0627335	0.0750331	47	0.0873453	0.10693	46	0.0626227	0.0720653	46
19.5	0.0927921	0.11617	46	0.0686283	0.125588	47	0.0797683	0.0850616	46	0.0648381	0.076186	46
20	0.0971793	0.165793	46	0.0711471	0.108678	47	0.108277	0.114733	46	0.0671041	0.0933362	46
20.5	0.131631	0.109992	46	0.0678875	0.0889733	47	0.125802	0.0966006	46	0.0695571	0.0856021	46
21	0.201893	0.161173	46	0.112657	0.133478	47	0.205998	0.209435	46	0.0695717	0.077538	46
21.5	0.215107	0.147713	46	0.191363	0.163541	47	0.297992	0.199852	46	0.110116	0.116045	46
22	0.321466	0.183463	46	0.24686	0.212039	47	0.399089	0.228739	46	0.185121	0.146157	46
22.5	0.388429	0.198773	46	0.273559	0.208659	47	0.505453	0.201196	46	0.263045	0.15458	46
23	0.396235	0.189937	46	0.343541	0.189959	47	0.512635	0.193416	46	0.29387	0.158842	46
23.5	0.462265	0.151841	46	0.417259	0.199866	47	0.499867	0.197609	46	0.324072	0.144824	46
24	0.520574	0.203934	46	0.456747	0.200191	47	0.494784	0.175391	46	0.356799	0.153275	46
0.5	0.6888	0.200225	46	0.790096	0.201642	47	0.643496	0.214632	46	0.598061	0.251311	46
1	0.433716	0.170549	46	0.518293	0.180804	47	0.375178	0.213014	46	0.288756	0.197091	46
1.5	0.29491	0.147214	46	0.349565	0.167785	47	0.245318	0.186955	46	0.156479	0.123259	46
2	0.151881	0.109539	46	0.210724	0.142697	47	0.158922	0.11	46	0.102055	0.102173	46
2.5	0.112909	0.116541	46	0.140669	0.116635	47	0.0940258	0.0990385	46	0.068358	0.0727071	46
3	0.0709875	0.0761158	46	0.0969561	0.0916884	47	0.0794846	0.084727	46	0.0390067	0.0521557	46
3.5	0.0715214	0.0825804	46	0.0718364	0.0700296	47	0.0592069	0.05459	46	0.0377674	0.0426972	46
4	0.0598217	0.0630887	46	0.0518151	0.0406087	47	0.0489117	0.0571442	46	0.0243153	0.0271326	46
4.5	0.0613877	0.0747042	46	0.0329555	0.0358027	47	0.0318694	0.0432539	46	0.0282005	0.034444	46
5	0.0520499	0.0625716	46	0.0452142	0.0473465	47	0.0271822	0.039226	46	0.0380857	0.0438917	46
5.5	0.0576955	0.051796	46	0.0478167	0.0488412	47	0.039523	0.0527831	46	0.0494831	0.0479745	46
6	0.0578726	0.0622479	46	0.0415924	0.0421793	47	0.0255579	0.0284982	46	0.0335296	0.0356924	46

## Sheet: C
Clk856>Cas9.M9	Clk856>sgRNACNMa	Clk856>Cas9.M9,sgRNACNMa	Cas9.M9,sgRNACNMa	male
-0.0413131	0.095791	0.150846
-0.0621573	0.065694	0.197335	0.164446
0.0704438		0.00210984	0.137296
0.199939	-0.10573	-0.0896562	0.0596566
-0.0429171	0.251309	0.13075	0.0145368
0.0429407	0.042939	0.104936	0.159592
0.059998	0.170804	0.27472
-0.0986394	-0.04584	0.169746	0.195594
0.121082	-0.06343	-0.010047	0.171344
0.231127	0.007447	0.268324	0.0501412
0.129739	-0.12516	0.146508	0.0887735
0.172406	-0.16017	0.048856	0.0256312
0.0688055	0.277101	0.14851	0.0115437
-0.129141	-0.08918		-0.0844425
-0.0555195	-0.13079	0.0950092	0.104589
0.0119166	0.215816		-0.179745
-0.343557	-0.16727		0.0232758
-0.10787	0.197065		-0.0286045
-0.0493501	-0.01029	0.36171	0.0456678
0.130666	0.279883	0.0974247	0.0337484
-0.0723504	-0.02154	0.0317482	0.100774
	-0.1206	-0.00327636	-0.0410122
0.0395152	-0.15563	0.382492	0.0153162
-0.0750661	0.0019	-0.115845	-0.0401009
-0.00127545	0.166965	0.0359457	0.0232741
-0.0494188	-0.13733	0.0395946	-0.030819
	-0.01636	0.049615	0.0714012
0.0346656	-0.12456	0.118212	-0.128376
-0.0441846	0.071403	-0.0425525	0.0752421
-0.217428	-0.24409	0.122059	-0.0570487
-0.0492204	-0.11017	0.0366486	0.0941243
0.136219	-0.22943	0.178406	0.0140172
0.157068	-0.06447	0.0512704	0.124455
0.160464	-0.024	0.247228	-0.00672145
-0.0576629	-0.1478	0.180995	0.0929346
	-0.0988	-0.142751	-0.0405276
0.121818	0.205731	0.168259	0.0854836
0.197376	-0.06329	0.0573238	0.0899226
0.240733	-0.11809	0.14084	-0.0562966
0.0165939	0.135025	0.113193	0.0215813
0.0420564	-0.04304	0.248613	0.180764
-0.0916469	-0.04052	0.118571	0.03346
-0.0438819	-0.03035	0.0290607	-0.00313984
0.0855486	-0.01475	0.0226879	-0.0827982
0.102139	-0.13868		-0.0770742
0.0357804	-0.12072	-0.00458903	-0.125022
-0.00144871	0.3069	0.299687	0.304282
-0.0515469	0.127418	0.245219	-0.0586845

## Sheet: D
female	Clk856>Cas9.M9			Clk856>sgRNACNMa			Clk856>Cas9.M9,sgRNACNMa			Cas9.M9,sgRNACNMa
ZT	mean	sd	n	mean	sd	n	mean	sd	n	mean	sd	n
6.5	0.307311	0.166133	24	0.23423	0.0951233	23	0.201943	0.126625	24	0.178158	0.100158	23
7	0.285103	0.137887	24	0.205211	0.0876105	23	0.205418	0.132744	24	0.198585	0.098887	23
7.5	0.293167	0.144931	24	0.226146	0.10789	23	0.240786	0.145595	24	0.163723	0.088411	23
8	0.257604	0.166035	24	0.259734	0.142325	23	0.217178	0.13526	24	0.217907	0.108997	23
8.5	0.294676	0.18901	24	0.283023	0.122798	23	0.232317	0.119899	24	0.2382	0.122067	23
9	0.287372	0.182272	24	0.272296	0.106509	23	0.27934	0.133074	24	0.258217	0.110635	23
9.5	0.335294	0.183316	24	0.309843	0.125315	23	0.33251	0.158528	24	0.321345	0.138059	23
10	0.346072	0.200857	24	0.323244	0.0931157	23	0.326229	0.159705	24	0.359071	0.111259	23
10.5	0.426676	0.230626	24	0.367999	0.126641	23	0.424967	0.182657	24	0.403761	0.134699	23
11	0.551116	0.167436	24	0.450088	0.140675	23	0.525561	0.18417	24	0.463914	0.132711	23
11.5	0.675729	0.166826	24	0.563112	0.145629	23	0.63937	0.179052	24	0.565024	0.137927	23
12	0.797293	0.155765	24	0.656055	0.14751	23	0.766064	0.148985	24	0.674281	0.132533	23
12.5	0.87785	0.175718	24	0.659747	0.212422	23	0.770241	0.174671	24	0.948576	0.133279	23
13	0.583791	0.212214	24	0.442082	0.244334	23	0.453713	0.228086	24	0.570542	0.251483	23
13.5	0.320229	0.144194	24	0.323282	0.171278	23	0.258366	0.178164	24	0.337878	0.167878	23
14	0.236241	0.100784	24	0.279977	0.213708	23	0.171245	0.131585	24	0.174586	0.116459	23
14.5	0.164964	0.0915243	24	0.199843	0.135879	23	0.119546	0.110233	24	0.129888	0.100503	23
15	0.147844	0.10852	24	0.186624	0.150297	23	0.105598	0.0771902	24	0.0881685	0.0597099	23
15.5	0.132494	0.0912707	24	0.191575	0.149506	23	0.0802105	0.0852914	24	0.0887559	0.082119	23
16	0.111222	0.0819288	24	0.197761	0.142513	23	0.114632	0.110845	24	0.0793104	0.090336	23
16.5	0.148246	0.107503	24	0.199444	0.168418	23	0.125402	0.102125	24	0.087526	0.101733	23
17	0.170963	0.10767	24	0.181387	0.170501	23	0.119467	0.0934745	24	0.0899638	0.08568	23
17.5	0.14129	0.108702	24	0.140261	0.109151	23	0.126927	0.0957351	24	0.0902193	0.0895454	23
18	0.109752	0.0807621	24	0.157111	0.137793	23	0.167735	0.152512	24	0.107053	0.142528	23
18.5	0.124019	0.105068	24	0.133948	0.107016	23	0.184732	0.15687	24	0.127391	0.121897	23
19	0.12818	0.138624	24	0.11771	0.103139	23	0.13771	0.112087	24	0.115549	0.0814546	23
19.5	0.0864065	0.0837184	24	0.0768685	0.0846238	23	0.172611	0.150474	24	0.168943	0.176311	23
20	0.121803	0.124063	24	0.0785069	0.100457	23	0.187137	0.173425	24	0.136836	0.116082	23
20.5	0.101856	0.104379	24	0.099249	0.0974206	23	0.195418	0.199998	24	0.143175	0.129586	23
21	0.176575	0.179854	24	0.0538439	0.0694749	23	0.269935	0.243412	24	0.109377	0.107243	23
21.5	0.173155	0.160027	24	0.0740715	0.119478	23	0.378051	0.262799	24	0.174261	0.131893	23
22	0.192361	0.201539	24	0.0708635	0.09464	23	0.511347	0.250781	24	0.224805	0.19886	23
22.5	0.230314	0.173784	24	0.0668774	0.0941489	23	0.626123	0.228954	24	0.176041	0.171065	23
23	0.270749	0.259341	24	0.147544	0.172004	23	0.577459	0.209842	24	0.246341	0.195898	23
23.5	0.373854	0.270267	24	0.249009	0.197837	23	0.564835	0.133315	24	0.325509	0.183127	23
24	0.549079	0.229191	24	0.417613	0.235016	23	0.552808	0.185461	24	0.4374	0.216699	23
0.5	0.771985	0.194538	24	0.953388	0.0893029	23	0.852484	0.159665	24	0.728716	0.149578	23
1	0.67357	0.167551	24	0.678844	0.141376	23	0.782611	0.143048	24	0.591717	0.169258	23
1.5	0.595976	0.157971	24	0.58128	0.117835	23	0.727445	0.170237	24	0.480856	0.149516	23
2	0.537001	0.150491	24	0.497287	0.13096	23	0.67333	0.130053	24	0.426377	0.114361	23
2.5	0.533378	0.135388	24	0.457677	0.116864	23	0.57054	0.149911	24	0.398168	0.1371	23
3	0.467989	0.149539	24	0.401977	0.11383	23	0.482616	0.152423	24	0.357482	0.110195	23
3.5	0.427756	0.162834	24	0.366751	0.120939	23	0.456269	0.189553	24	0.317252	0.117056	23
4	0.403453	0.150468	24	0.334724	0.123168	23	0.357214	0.171962	24	0.289292	0.0981317	23
4.5	0.376754	0.162123	24	0.308363	0.111801	23	0.31111	0.146106	24	0.277158	0.114361	23
5	0.363242	0.151779	24	0.304365	0.125093	23	0.297477	0.171734	24	0.257524	0.124622	23
5.5	0.306298	0.139745	24	0.283527	0.133276	23	0.247434	0.148529	24	0.21262	0.0895728	23
6	0.282579	0.155861	24	0.264826	0.0998541	23	0.25534	0.138818	24	0.187724	0.0903941	23

## Sheet: E
Clk856>Cas9.M9	Clk856>sgRNACNMa	Clk856>Cas9.M9,sgRNACNMa	Cas9.M9,sgRNACNMa	female
-0.0119698	-0.221583	0.150811	-0.104537
-0.0186487	-0.160341	-0.100202	-0.0334994
0.080885	-0.111162	0.247958	-0.111051
-0.136092	-0.197301	-0.0244153	-0.258014
0.182948	-0.0806098	0.181806	-0.0665333
-0.0321241	-0.221277	0.00473125	0.148239
-0.202854	-0.103184	-0.165834	-0.0542249
-0.0166061	0.0653058	0.296612	-0.0927904
-0.225856	-0.118207	0.130584	-0.0792674
-0.31686	-0.0829249	0.00244651	-0.0499337
-0.184732	-0.17799	0.339606	0.0291686
-0.256666	-0.11834	0.420962	0.00204608
0.00262883		0.0970544	-0.095171
-0.284878	-0.19171	0.14143	-0.0542038
0.202545	-0.0105385	-0.12243
-0.123446	-0.0643044	0.173673	-0.0106134
-0.184983	-0.154479	0.323374	-0.112661
0.086158	-0.106386	0.091206	0.0622434
0.12246	-0.0829047	0.262944	-0.0505127
-0.0669668	-0.149706	0.144146	-0.236898
-0.154903	-0.0555555	0.0703099	-0.118362
-0.299293	0.168776	0.388419	-0.285635
-0.0619029	-0.0935138	0.0326093	0.12176
-0.175593	-0.27713	0.307066	0.0527157

## Sheet: F
female	Clk856>Cas9.M6			Clk856>sgRNACNMa			Clk856>Cas9.M6,sgRNACNMa			Cas9.M6,sgRNACNMa
ZT	mean	sd	n	mean	sd	n	mean	sd	n	mean	sd	n
6.5	0.165718	0.133267	23	0.137501	0.121019	24	0.192715	0.164196	23	0.184654	0.132981	24
7	0.161475	0.149217	23	0.131065	0.121992	24	0.13817	0.119387	23	0.166194	0.112412	24
7.5	0.170019	0.137658	23	0.094682	0.103771	24	0.132521	0.143117	23	0.181273	0.163394	24
8	0.120697	0.11637	23	0.078855	0.099697	24	0.143539	0.145626	23	0.148643	0.098459	24
8.5	0.155454	0.132614	23	0.110492	0.111618	24	0.1246	0.115445	23	0.143933	0.117462	24
9	0.164645	0.124856	23	0.092182	0.078554	24	0.131316	0.139761	23	0.162697	0.123042	24
9.5	0.160133	0.137457	23	0.099599	0.091931	24	0.184526	0.142815	23	0.216193	0.137163	24
10	0.179115	0.118276	23	0.129417	0.105192	24	0.207483	0.114025	23	0.233665	0.134945	24
10.5	0.223903	0.144749	23	0.139665	0.099088	24	0.288341	0.135801	23	0.333401	0.149597	24
11	0.292832	0.156352	23	0.246356	0.099761	24	0.378402	0.174759	23	0.427522	0.125086	24
11.5	0.431686	0.194679	23	0.388479	0.122783	24	0.487552	0.169703	23	0.548964	0.147422	24
12	0.626706	0.173509	23	0.543874	0.111938	24	0.631301	0.213152	23	0.629626	0.180074	24
12.5	0.71992	0.237627	23	0.748784	0.218386	24	0.79272	0.22558	23	0.704944	0.247881	24
13	0.241139	0.152974	23	0.454596	0.242367	24	0.34056	0.231317	23	0.356568	0.267644	24
13.5	0.150512	0.087155	23	0.33333	0.22865	24	0.222826	0.186398	23	0.197156	0.174626	24
14	0.09014	0.075059	23	0.172618	0.138284	24	0.134194	0.136173	23	0.127858	0.113673	24
14.5	0.108779	0.112457	23	0.098588	0.093976	24	0.089485	0.093384	23	0.070683	0.065144	24
15	0.084313	0.068217	23	0.075703	0.08616	24	0.077816	0.067758	23	0.076574	0.089182	24
15.5	0.057126	0.048965	23	0.057204	0.070178	24	0.068079	0.083984	23	0.080416	0.095839	24
16	0.074902	0.068158	23	0.055617	0.065242	24	0.044783	0.038173	23	0.083443	0.129819	24
16.5	0.064538	0.063362	23	0.041388	0.05031	24	0.073587	0.093931	23	0.07834	0.094662	24
17	0.066935	0.060513	23	0.050906	0.081273	24	0.078963	0.153975	23	0.074936	0.10447	24
17.5	0.055827	0.066959	23	0.039357	0.049551	24	0.051576	0.070339	23	0.055702	0.079906	24
18	0.031027	0.051411	23	0.020436	0.036794	24	0.052026	0.084144	23	0.066215	0.108785	24
18.5	0.030248	0.047084	23	0.023636	0.069276	24	0.05264	0.079879	23	0.057963	0.091705	24
19	0.037473	0.048468	23	0.024469	0.059699	24	0.112104	0.15574	23	0.036822	0.061617	24
19.5	0.021983	0.02964	23	0.018616	0.041638	24	0.091373	0.136152	23	0.037778	0.059259	24
20	0.042419	0.057377	23	0.019433	0.0411	24	0.09603	0.161097	23	0.022939	0.036474	24
20.5	0.06112	0.063481	23	0.018523	0.040933	24	0.09593	0.120102	23	0.033173	0.054055	24
21	0.062308	0.093093	23	0.026301	0.053557	24	0.18584	0.20497	23	0.033934	0.095168	24
21.5	0.056686	0.061645	23	0.044353	0.098804	24	0.229061	0.190226	23	0.028422	0.069517	24
22	0.067048	0.080714	23	0.024927	0.048038	24	0.358466	0.205586	23	0.02314	0.060091	24
22.5	0.07974	0.093095	23	0.026098	0.067418	24	0.378928	0.176188	23	0.012235	0.027426	24
23	0.077303	0.104132	23	0.053491	0.097704	24	0.358974	0.160314	23	0.023979	0.050725	24
23.5	0.183598	0.20348	23	0.06319	0.117699	24	0.353648	0.197039	23	0.062397	0.10607	24
24	0.370483	0.258194	23	0.112545	0.153277	24	0.366456	0.180422	23	0.121855	0.170871	24
0.5	0.942764	0.117301	23	0.983306	0.05417	24	0.896358	0.132195	23	0.946395	0.09919	24
1	0.614969	0.121364	23	0.614754	0.110057	24	0.642834	0.139079	23	0.658361	0.143166	24
1.5	0.531623	0.130466	23	0.521562	0.111683	24	0.570954	0.142974	23	0.523246	0.145906	24
2	0.490281	0.124802	23	0.469763	0.093142	24	0.492183	0.157523	23	0.481777	0.168687	24
2.5	0.442497	0.13003	23	0.43824	0.113078	24	0.447323	0.139422	23	0.454339	0.190433	24
3	0.38143	0.145754	23	0.339003	0.124806	24	0.387655	0.17344	23	0.420405	0.168771	24
3.5	0.383127	0.135497	23	0.307499	0.132972	24	0.39409	0.171028	23	0.394811	0.177367	24
4	0.339245	0.129675	23	0.281154	0.1018	24	0.287946	0.13999	23	0.327407	0.170288	24
4.5	0.327543	0.14523	23	0.240305	0.112637	24	0.289427	0.197595	23	0.317801	0.177528	24
5	0.281675	0.138561	23	0.22322	0.11434	24	0.227585	0.184961	23	0.270119	0.124584	24
5.5	0.266504	0.148471	23	0.168575	0.111406	24	0.206144	0.157484	23	0.24145	0.139828	24
6	0.214436	0.150168	23	0.134544	0.091204	24	0.160278	0.165318	23	0.198377	0.153071	24

## Sheet: G
Clk856>Cas9.M6	Clk856>sgRNACNMa	Clk856>Cas9.M6,sgRNACNMa	Cas9.M6,sgRNACNMa	female
-0.07004	0.034962	0.081174	-0.15458
0.03351	-0.03607	0.034561	-0.1621
0.093283	-0.02101	0.222878	-0.08646
-0.33602	-0.0017	0.059397	0.001686
-0.14917	-0.07209	0.090038	-0.06803
-0.10859	-0.05225		-0.24855
0.085353	-0.00416	0.065151	0.000293
-0.00263	0.004402	0.017459	-0.00466
0.001648	-0.04395	-0.02	0.004092
-0.10256	0.039301	0.186657	0.005684
-0.16915	-0.04635	0.025699	-0.1088
-0.07769	0.161961	0.038319	-0.02078
-0.22993	-0.26414	0.105559	-0.04539
	3.56e-05	-0.08488	-0.09498
-0.2333	-0.07718	-0.03262	-0.02204
-0.16204	-0.04464	0.230872	0.003806
0.032045	0.006464	0.216666	0.002082
-0.11962	4.26e-05	0.140885	-0.00299
-0.00978	-0.04714	0.025464	-0.00742
-0.11577	-0.07611	0.188685	-0.01594
-0.17055	-0.13936	-0.10821	-0.04009
0.0143	-0.01305	-0.01361	0.003274
-0.1103	-0.00079	0.242081	0.015391
-0.17632	0.003834	0.001366	0.000351
