# Supplementary material for: Conditional chemoconnectomics (cCCTomics) as a strategy for efficient and conditional targeting of chemical transmission
Source: eLife journal article supplement (doi:10.7554/elife.91927), 2023-12-19
Supplement: fig6-figsupp2-data1 [file Figure 6-figure supplement 2-Source data.xlsx]

## Sheet: A
ZT(h)	+; UAS-Pdfr/+			Pdfr-attpKO; UAS-Pdfr/+			Pdfr-attpKO;; 4178/+			Pdfr-attpKO;UAS-Pdfr; 4178/+			Pdfr-attpKO;; R79A11-GAL4/+			Pdfr-attpKO;UAS-Pdfr; R79A11-GAL4/+			Pdfr-attpKO;; R91F02-GAL4/+			Pdfr-attpKO;UAS-Pdfr; R91F02-GAL4/+
6.5	306	260.777	47	430	400.352	47	605	474.815	47	473	389.218	46	457	494.298	48	387	275.77	44	773	681.058	48	642	464.019	43
7	299	271.803	47	511	467.121	47	889	562.938	47	525	439.03	46	635	535.638	48	471	342.924	44	825	739.576	48	729	460.433	43
7.5	368	302.493	47	674	523.734	47	959	575.12	47	640	470.419	46	822	581.534	48	583	343.87	44	1150	720.054	48	850	520.455	43
8	528	384.692	47	858	531.846	47	1320	624.736	47	762	438.577	46	1070	654.283	48	674	364.677	44	1430	656.78	48	1070	685.729	43
8.5	700	540.638	47	1110	582.484	47	1580	618.392	47	903	520.143	46	1340	605.773	48	911	469.216	44	1780	655.537	48	1310	788.005	43
9	883	494.321	47	1290	515.201	47	1720	594.493	47	1070	494.156	46	1590	646.165	48	1090	482.11	44	2070	741.947	48	1500	785.029	43
9.5	1040	629.743	47	1500	562.016	47	1910	576.527	47	1310	710.091	46	1880	667.168	48	1280	501.131	44	2230	821.226	48	1730	831.258	43
10	1200	602.161	47	1650	603.257	47	2160	562.947	47	1460	633.613	46	2190	661.861	48	1430	517.858	44	2400	890.516	48	1830	827.193	43
10.5	1540	722.655	47	1830	611.93	47	2320	603.634	47	1540	678.8	46	2280	716.23	48	1610	553.77	44	2590	995.495	48	2050	889.366	43
11	2010	838.805	47	1860	659.765	47	2410	623.109	47	1590	577.672	46	2420	804.898	48	1650	570.298	44	2660	1032.62	48	2050	900.687	43
11.5	2530	1114.58	47	1870	646.117	47	2360	619.776	47	1540	661.714	46	2300	858.921	48	1680	624.523	44	2510	1088.21	48	2020	930.94	43
12	3170	1420.84	47	1770	673.933	47	2300	674.932	47	1450	603.551	46	2050	906.487	48	1560	589.141	44	2380	1109.4	48	1950	912.088	43
12.5	5060	2123.5	47	2990	1523.45	47	4480	1632.62	47	2390	1269.02	46	3660	1638.69	48	3070	1358.02	44	4260	1827.19	48	2920	1681.89	43
13	2500	1816.18	47	1210	1326.27	47	3130	1817.79	47	1090	1278.82	46	2020	1560.76	48	1510	1550.68	44	2280	1653.57	48	1310	1372.08	43
13.5	1430	1490.07	47	582	752.29	47	2240	1790.29	47	701	964.238	46	1170	1264.78	48	748	1188.17	44	1520	1551.55	48	823	1014.34	43
14	694	850.9	47	421	556.725	47	1810	1694.41	47	634	892.067	46	741	863.161	48	574	993.461	44	1370	1460.55	48	603	775.814	43
14.5	396	479.045	47	403	396.907	47	1620	1540.99	47	578	711.325	46	543	581.365	48	547	978.923	44	1040	977.423	48	669	682.646	43
15	295	307.809	47	298	311.935	47	1550	1472.42	47	527	540.694	46	482	543.614	48	620	821.124	44	913	817.192	48	694	659.464	43
15.5	290	295.663	47	333	314.483	47	1550	1377.47	47	516	558.475	46	485	625.422	48	552	653.674	44	964	975.194	48	648	679.93	43
16	292	325.569	47	400	545.597	47	1420	1353.98	47	529	666.177	46	495	481.402	48	552	598.485	44	920	927.628	48	673	596.684	43
16.5	315	450.414	47	448	481.41	47	1420	1240.29	47	564	722.889	46	543	641.696	48	632	717.8	44	922	946.666	48	779	584.031	43
17	319	374.205	47	483	587.347	47	1400	1016.07	47	595	678.244	46	594	547.496	48	611	740.975	44	1170	930.331	48	722	635.193	43
17.5	274	322.955	47	505	553.29	47	1430	1222.3	47	568	567.421	46	786	909.977	48	492	426.337	44	1280	1170.77	48	929	782.053	43
18	261	237.374	47	549	615.835	47	1420	1230.38	47	496	593.45	46	939	821.533	48	630	607.283	44	1480	1350.67	48	925	787.263	43
18.5	296	374.932	47	579	659.138	47	1530	1231.65	47	526	695.086	46	988	914.976	48	550	711.841	44	1320	1172.46	48	923	839.145	43
19	215	241.534	47	600	676.092	47	1460	1204.79	47	560	717.48	46	950	940.266	48	518	532.017	44	1260	1161.87	48	804	693.204	43
19.5	256	253.018	47	696	658.57	47	1550	1134.26	47	529	610.324	46	960	950.125	48	551	556.741	44	1240	1003.89	48	790	715.424	43
20	240	340.111	47	594	585.433	47	1430	1074.29	47	710	826.233	46	1060	1039.39	48	592	687.896	44	1220	999.096	48	779	859.505	43
20.5	352	428.407	47	487	548.941	47	1300	1135.39	47	749	727.226	46	1020	983.503	48	671	662.437	44	1110	1181.69	48	748	734.713	43
21	451	500.715	47	458	531.823	47	1100	1031.51	47	1060	914.262	46	693	698.912	48	1110	964.331	44	921	891.41	48	600	688.101	43
21.5	710	692.026	47	404	506.76	47	983	1165.34	47	1440	1214.76	46	449	600.424	48	1380	1109.59	44	835	837.21	48	770	739.586	43
22	990	906.229	47	451	567.198	47	903	1096.45	47	1270	1096.49	46	349	409.871	48	1180	1149.92	44	669	846.546	48	921	734.245	43
22.5	1140	1048.98	47	636	673.05	47	1110	1025.22	47	1150	1002.86	46	484	420.664	48	1240	1115.49	44	872	1013.75	48	1100	958.5	43
23	1580	1120.97	47	755	711.286	47	1210	1061.37	47	1180	946.088	46	761	692.368	48	1480	1181.26	44	1050	1069.01	48	1000	762.822	43
23.5	2020	1200.17	47	805	649.842	47	1460	1058.29	47	1270	1013.27	46	914	816.461	48	1740	1212.57	44	1230	1059.23	48	1340	1040.17	43
24	2310	1308.1	47	848	643.085	47	1380	977.056	47	1380	1102.9	46	820	726.535	48	1860	1131.24	44	1410	945.264	48	1340	1037.34	43
0.5	3430	1492.15	47	1890	708.837	47	2710	1262.99	47	1850	1236.8	46	2580	1134.69	48	1900	887.164	44	2470	1488.98	48	1950	959.358	43
1	2250	1250.25	47	1290	806.047	47	2140	1316.65	47	1310	1002.98	46	1360	1077.28	48	1270	771.073	44	1340	1154.76	48	1380	815.911	43
1.5	1210	818.649	47	654	549.053	47	1160	1125.03	47	800	727.863	46	465	576.124	48	724	553.758	44	851	858.842	48	987	666.689	43
2	623	561.796	47	491	526.341	47	830	984.532	47	529	559.197	46	257	375.163	48	463	355.718	44	641	738.43	48	705	490.999	43
2.5	570	546.286	47	440	419.136	47	601	729.908	47	609	533.975	46	259	359.413	48	398	331.278	44	555	623.296	48	704	548.042	43
3	367	317.497	47	476	520.913	47	664	638.334	47	511	520.186	46	352	350.593	48	405	332.781	44	579	614.465	48	622	451.216	43
3.5	311	251.198	47	352	348.638	47	621	476.869	47	534	508.001	46	273	331.875	48	401	320.439	44	698	711.204	48	583	400.774	43
4	336	312.2	47	504	447.376	47	469	470.696	47	480	480.554	46	339	298.428	48	368	251.384	44	691	617.393	48	749	605.149	43
4.5	302	275.789	47	374	413.333	47	583	653.502	47	469	442.516	46	381	330.116	48	380	257.209	44	648	635.533	48	675	551.777	43
5	331	413.461	47	358	323.562	47	627	593.431	47	470	466.647	46	454	495.094	48	364	250.237	44	463	481.392	48	531	385.745	43
5.5	269	275.912	47	413	384.519	47	599	519.25	47	509	519.985	46	457	531.406	48	376	235.848	44	597	540.728	48	539	417.43	43
6	239	250.042	47	475	418.678	47	663	537.496	47	482	467.931	46	435	361.239	48	384	267.354	44	543	609.024	48	660	537.445	43

## Sheet: B
ZT	CNMa_GAL4-UAS_Cas9.M6			CNMa_GAL4-UAS_sgRNA(pdfr)			CNMa_GAL4-UAS_Cas9.M6-UAS_sgRNA(pdfr)			UAS_Cas9.M6-UAS_sgRNA(pdfr)			R51H05_GAL4-UAS_Cas9.M6			R51H05_GAL4-UAS_sgRNA(pdfr)			R51H05_GAL4-UAS_Cas9.M6-UAS_sgRNA(pdfr)
6.5	144.614	143.962	41	79.7388	100.377	39	210.066	271.714	39	170.251	194.302	20	248.885	434.09	42	118.714	161.253	39	804.475	670.231	40
7	170.423	158.861	41	68.3987	68.0096	39	236.566	277.849	39	159.272	215.982	20	260.678	428.215	42	247.652	263.306	39	845.516	725.634	40
7.5	191.992	262.03	41	105.13	148.887	39	319.611	440.22	39	183.394	225.554	20	255.802	346.597	42	185.594	175.772	39	1045.73	773.376	40
8	213.855	200.419	41	85.4761	80.9446	39	429.07	540.086	39	387.019	480.264	20	273.912	323.394	42	203.194	221.758	39	1434.55	988.491	40
8.5	323.083	235.077	41	210.03	281.859	39	625.809	518.888	39	543.329	443.599	20	526.647	519.467	42	337.532	525.085	39	1743.06	975.989	40
9	490.887	428.159	41	190.457	207.776	39	811.763	613.633	39	515.246	452.51	20	943.556	837.287	42	299.737	317.195	39	1944.25	873.436	40
9.5	919.789	557.905	41	285.64	447.324	39	969.869	602.476	39	1047.02	623.846	20	914.663	711.069	42	588.254	516.52	39	1927.95	904.873	40
10	1204.7	449.172	41	406.406	314.172	39	1137.36	625.856	39	1219.69	523.438	20	1146.44	721.416	42	759.809	531.659	39	1980.35	932.047	40
10.5	1596.11	442.352	41	646.76	408.733	39	1268.16	646.934	39	1650.88	524.764	20	1443.39	698.385	42	1293.05	691.379	39	2081.26	917.365	40
11	1867.39	394.208	41	1013.22	550.886	39	1398.03	668.962	39	1936.47	530.146	20	1828.71	677.59	42	2003.87	646.58	39	2317.51	1022.49	40
11.5	2170.98	469.009	41	1419.95	544.47	39	1643.66	766.732	39	2361.97	694.256	20	1978.77	759.54	42	2361.78	753.938	39	2645.17	1093.59	40
12	2243.18	484.388	41	1548.57	587.974	39	1686.86	811.016	39	2709.82	777.904	20	2121.2	763.427	42	2516.93	759.958	39	2992.44	1106.11	40
12.5	3534.5	1609.74	41	3705.07	1194.26	39	3937.8	1266.22	39	4271.48	1329.71	20	3458.63	1338.95	42	4488.31	1633.83	39	5454.3	2079.54	40
13	953.987	989.17	41	548.385	847.792	39	614.699	783.088	39	1323.71	803.807	20	1431.44	1157.8	42	1505.12	1528.23	39	2102.25	1723.72	40
13.5	450.184	448.922	41	146.616	357.586	39	282.862	341.032	39	653.106	377.876	20	883.863	992.66	42	888.656	1278.43	39	971.924	1156.3	40
14	320.385	327.998	41	106.094	313.526	39	308.194	306.451	39	464.202	292.501	20	611.299	902.18	42	565.715	1028.68	39	662.921	910.457	40
14.5	214.513	222.217	41	83.4153	124.898	39	269.416	234.071	39	478.613	427.767	20	602.807	812.256	42	257.697	506.611	39	544.215	830.001	40
15	263.268	229.787	41	86.404	193.51	39	274.38	302.604	39	457.219	378.883	20	604.08	802.34	42	140.671	161.552	39	481.581	776.357	40
15.5	258.187	206.658	41	176.926	225.021	39	212.271	214.146	39	416.076	411.862	20	639.962	826.754	42	142.304	173.781	39	505.943	752.056	40
16	299.09	279.393	41	136.425	192.423	39	350.931	272.762	39	474.113	523.563	20	612.995	786.561	42	150.177	172.466	39	535.893	551.433	40
16.5	227.731	181.016	41	133.312	125.63	39	250.16	183.224	39	294.955	247.06	20	639.942	927.008	42	111.837	158.609	39	380.312	428.251	40
17	331.705	281.904	41	153.25	167.805	39	359.884	286.068	39	266.05	316.696	20	662.754	792.233	42	184.256	211.431	39	421.169	531.257	40
17.5	256.003	258.017	41	112.864	129.436	39	301.495	337.596	39	307.073	398.334	20	602.209	649.349	42	96.4927	101.475	39	409.168	451.161	40
18	283.135	268.964	41	160.428	176.771	39	417.283	403.153	39	283.704	341.781	20	623.16	725.115	42	160.431	186.793	39	735.58	742.58	40
18.5	290.236	279.532	41	118.909	133.401	39	325.308	290.398	39	255.861	402.939	20	576.116	681.225	42	131.989	147.439	39	744.628	800.053	40
19	325.66	352.827	41	119.806	146.061	39	329.816	276.675	39	339.893	386.778	20	393.489	491.896	42	157.171	139.931	39	872.088	815.902	40
19.5	246.418	297.836	41	164.053	151.74	39	344.791	386.683	39	256.568	428.009	20	288.981	424.996	42	118.358	154.19	39	816.343	611.312	40
20	191.408	174.323	41	95.2913	106.289	39	348.456	302.568	39	176.766	303.889	20	317.487	517.524	42	124.52	123.092	39	669.106	535.123	40
20.5	255.697	261.813	41	109.696	126	39	396.269	379.053	39	95.0186	125.175	20	417.149	566.806	42	120.1	146.447	39	478.279	573.969	40
21	378.252	341.443	41	248.701	289.632	39	309.498	324.182	39	226.917	333.027	20	527	707.203	42	156.388	264.249	39	359.881	469.588	40
21.5	482.131	483.891	41	233.911	321.771	39	247.065	297.43	39	215.115	248.29	20	459.378	439.529	42	272.54	467.668	39	280.786	413.682	40
22	518.042	508.797	41	241.82	265.011	39	226.402	259.182	39	194.197	209.629	20	582.337	721.025	42	341.188	667.351	39	258.957	345.941	40
22.5	539.532	529.304	41	364.64	327.511	39	400.172	361.612	39	266.713	344.775	20	491.13	610.14	42	318.755	503.851	39	453.067	655.937	40
23	1099.17	711.275	41	679.676	446.589	39	684.033	592.578	39	487.396	394.278	20	1009.54	829.833	42	985.363	852.532	39	828.965	907.94	40
23.5	1545.55	667.924	41	1341.3	662.003	39	1145.33	786.98	39	1251.62	873.375	20	1753.61	983.765	42	1577.4	1019.75	39	1640.89	1197.2	40
24	1892.54	486.188	41	1464.03	638.706	39	1608.75	760.537	39	1888.36	645.138	20	2046.99	857.482	42	1916.76	894.899	39	2369.69	1005.54	40
0.5	1559.84	522.469	41	1537.76	760.374	39	1937.13	984.725	39	2707.72	794.866	20	2644.94	1026.16	42	3543.36	912.127	39	3664.94	1145.05	40
1	692.212	423.088	41	376.256	288.43	39	1178.71	858.482	39	1700.02	832.207	20	1644.26	919.321	42	1903.83	823.709	39	2700.93	1095.78	40
1.5	687.641	556.795	41	209.8	195.824	39	727.75	663.935	39	1080.8	697.143	20	1195.53	755.928	42	1043.82	674.362	39	2378.84	1053.25	40
2	263.271	357.939	41	68.3186	87.9702	39	405.81	485.928	39	374.745	361.838	20	593.078	681.804	42	415.365	609.492	39	2062.7	978.882	40
2.5	187.44	192.41	41	80.8556	142.207	39	255.303	318.206	39	279.177	296.297	20	358.486	500.41	42	196.722	308.789	39	1642.38	974.06	40
3	185.762	246.96	41	82.4461	138.35	39	259.307	294.419	39	174.317	143.743	20	215.059	379.009	42	169.814	221.254	39	1319.38	909.447	40
3.5	156.932	186.546	41	81.4985	225.346	39	267.879	373.822	39	114.97	163.038	20	211.291	276.283	42	90.5457	163.567	39	1013.46	833.839	40
4	160.055	216.2	41	57.0644	56.3631	39	160.879	213.24	39	214.702	276.904	20	213.822	309.399	42	137.554	196.969	39	837.143	778.439	40
4.5	243.136	269.805	41	58.9963	75.0115	39	198.907	314.106	39	200.957	241.472	20	237.166	250.398	42	109.849	210.232	39	861.307	816.899	40
5	156.453	142.999	41	80.3403	116.67	39	230.459	296.524	39	226.691	365.703	20	234.532	298.476	42	107.505	156.323	39	878.433	783.044	40
5.5	153.034	188.337	41	87.6143	128.898	39	185.959	241.418	39	185.926	228.563	20	234.508	276.12	42	123.807	122.834	39	923.643	883.264	40
6	119.195	113.109	41	78.3052	108.738	39	186.142	215.406	39	229.43	405.738	20	271.476	544.766	42	129.56	170.464	39	836.551	728.357	40
