# Supplementary material for: Conditional chemoconnectomics (cCCTomics) as a strategy for efficient and conditional targeting of chemical transmission
Source: eLife journal article supplement (doi:10.7554/elife.91927), 2023-12-19
Supplement: fig7-data1 [file Figure 7-Source data.xlsx]

## Sheet: fig7B
	w11118			CNMaRKO/+			CNMaRKO/KO
ZT	mean	sd	n	mean	sd	n	mean	sd	n
6.5	0.126944	0.085124	47	0.019323	0.01567	47	0.020291	0.019875	47
7	0.127456	0.093229	47	0.024412	0.026974	47	0.026166	0.034044	47
7.5	0.135709	0.085782	47	0.024822	0.021022	47	0.032301	0.037032	47
8	0.155316	0.10196	47	0.038446	0.043189	47	0.02729	0.034351	47
8.5	0.186245	0.094912	47	0.03964	0.035123	47	0.038166	0.03748	47
9	0.221095	0.125263	47	0.059485	0.054624	47	0.065219	0.060449	47
9.5	0.248166	0.110666	47	0.074122	0.055081	47	0.080314	0.078237	47
10	0.275487	0.105449	47	0.114578	0.071214	47	0.111939	0.095602	47
10.5	0.374295	0.125003	47	0.193036	0.111289	47	0.173913	0.115654	47
11	0.492595	0.161115	47	0.352636	0.128882	47	0.353163	0.184772	47
11.5	0.617654	0.149137	47	0.537003	0.136314	47	0.529196	0.194882	47
12	0.727132	0.158795	47	0.697024	0.140359	47	0.651201	0.201857	47
12.5	0.960967	0.101043	47	0.990165	0.058925	47	0.981257	0.087134	47
13	0.36676	0.243117	47	0.697815	0.206495	47	0.354232	0.312624	47
13.5	0.096125	0.155456	47	0.347181	0.277421	47	0.057725	0.117167	47
14	0.050178	0.106269	47	0.102472	0.166683	47	0.006087	0.018108	47
14.5	0.061083	0.096381	47	0.021007	0.031745	47	0.004946	0.015239	47
15	0.078303	0.105442	47	0.015631	0.02416	47	0.007441	0.017513	47
15.5	0.055392	0.071974	47	0.017742	0.027423	47	0.020397	0.055828	47
16	0.062438	0.090837	47	0.051935	0.09819	47	0.012473	0.030924	47
16.5	0.083989	0.116428	47	0.040057	0.054183	47	0.023436	0.040011	47
17	0.087087	0.127523	47	0.036492	0.05801	47	0.02602	0.038892	47
17.5	0.085965	0.153213	47	0.024857	0.033925	47	0.037271	0.056953	47
18	0.080398	0.107454	47	0.042284	0.062979	47	0.037497	0.049319	47
18.5	0.078765	0.112918	47	0.066583	0.095471	47	0.05395	0.081039	47
19	0.061708	0.062926	47	0.031647	0.042828	47	0.049958	0.071345	47
19.5	0.076232	0.130406	47	0.048106	0.057471	47	0.055064	0.094463	47
20	0.08031	0.144457	47	0.033532	0.054894	47	0.030188	0.033665	47
20.5	0.097804	0.167557	47	0.043843	0.072192	47	0.038509	0.055195	47
21	0.092913	0.110917	47	0.046928	0.054688	47	0.046954	0.067365	47
21.5	0.125506	0.145472	47	0.062603	0.065313	47	0.063742	0.079106	47
22	0.196473	0.186272	47	0.117106	0.163327	47	0.183075	0.1461	47
22.5	0.211962	0.188311	47	0.152978	0.147568	47	0.232933	0.158746	47
23	0.256625	0.189794	47	0.218624	0.152303	47	0.221213	0.148185	47
23.5	0.420891	0.232508	47	0.239747	0.123225	47	0.220574	0.154422	47
24	0.458433	0.212367	47	0.308226	0.155465	47	0.214631	0.170261	47
0.5	0.703114	0.20405	47	0.355726	0.138695	47	0.236799	0.163898	47
1	0.488358	0.192922	47	0.149997	0.102145	47	0.069779	0.069357	47
1.5	0.335739	0.160696	47	0.074627	0.05562	47	0.040879	0.051812	47
2	0.217954	0.129779	47	0.030779	0.033065	47	0.035497	0.057756	47
2.5	0.159418	0.143794	47	0.025309	0.028306	47	0.027022	0.032533	47
3	0.125189	0.104786	47	0.020585	0.024563	47	0.021678	0.031551	47
3.5	0.133288	0.117358	47	0.020207	0.021334	47	0.031634	0.054995	47
4	0.11404	0.130919	47	0.016113	0.017117	47	0.032892	0.052845	47
4.5	0.103209	0.108148	47	0.013824	0.013727	47	0.015271	0.016468	47
5	0.109701	0.092762	47	0.017892	0.019251	47	0.030659	0.054945	47
5.5	0.106518	0.090308	47	0.018742	0.016801	47	0.023232	0.036331	47
6	0.118375	0.105494	47	0.018619	0.019176	47	0.035901	0.073049	47

## Sheet: fig7C
w11118	CNMaRKO/+	CNMaRKO/KO
0.135267	0.012387	0.026192
0.080065	-0.14925	0.009522
-0.16425	-0.02056	0.214914
-0.1764	-0.00687	0.037484
-0.09951	0.122878	0.045784
0.116061	0.030056	0.081542
-0.39473	-0.07434	-0.00388
-0.07208	-0.08544	0.028519
0.26699	-0.01958	0.173061
-0.07114	-0.04827	0.036322
-0.00058	0.02271	0.24345
-0.09374	0.084154	0.013073
-0.09923	0.008323	-0.05404
-0.03693	-0.05134	-0.08568
-0.0064	0.454087	0.241093
-0.08878	0.082609	0.139884
-0.04554	-0.08901	-0.02587
0.012877	0.051498	0.007917
-0.21208	-0.12923	0.044445
0.0784	-0.04245	0.044444
0.036787	0.03511	0.045913
-0.12852	-0.09041	0.051749
-0.07325	-0.03217	0.135653
0.048484		-0.07634
0.002998	-0.04513	0.054169
-0.1617	-0.08106	0.028392
-0.12728	0.055823	0.012171
-0.00262	0.018125	-0.00906
-0.02998	-0.13737	0.023477
-0.12616	0.043601	0.031077
-0.04089	-0.05692	0.036336
-0.08968	-0.07982	0.030942
0.114944	0.045816	0.225092
-0.12195	-0.17129
-0.16703	0.076641	0.039194
-0.11232	-0.05519	0.034646
-0.02544	-0.0392	0.100805
-0.09039	-0.07575	0.255612
-0.04124	0.047354	0.029691
0.138066	0.025236	0.084394
0.097376	-0.00508	0.181258
0.021001	0.046372	0.208151
-0.20121	-0.03218	0.072262
-0.20307	-0.01231	0.237985
0.165859	-0.049	0.25125
-0.15999	0.010058	0.060713
-0.05722	-0.09033	0.055465
	-0.04254	0.009464

## Sheet: fig7D
	w11118			CNMaRKO/+			CNMaRKO/KO
ZT	mean	sd	n	mean	sd	n	mean	sd	n
6.5	0.248658	0.125697	48	0.147878	0.105251	48	0.116262	0.133789	48
7	0.253678	0.140326	48	0.124464	0.11729	48	0.10893	0.117159	48
7.5	0.250273	0.106887	48	0.115402	0.092316	48	0.125863	0.177296	48
8	0.239343	0.11948	48	0.124791	0.090032	48	0.107353	0.109379	48
8.5	0.26009	0.112624	48	0.131308	0.099711	48	0.118684	0.118608	48
9	0.233547	0.128232	48	0.14535	0.118836	48	0.162676	0.136049	48
9.5	0.278625	0.133559	48	0.180928	0.128116	48	0.157813	0.114492	48
10	0.282226	0.124287	48	0.228272	0.129801	48	0.177858	0.146081	48
10.5	0.30852	0.150262	48	0.291285	0.151729	48	0.325626	0.190896	48
11	0.397648	0.172108	48	0.459707	0.131286	48	0.493489	0.199255	48
11.5	0.539122	0.169106	48	0.656739	0.14025	48	0.715563	0.178489	48
12	0.697076	0.146679	48	0.833248	0.141079	48	0.78287	0.226491	48
12.5	0.930751	0.113458	48	0.968557	0.092175	48	0.843042	0.247972	48
13	0.653586	0.217761	48	0.664196	0.212027	48	0.266337	0.248237	48
13.5	0.336502	0.200011	48	0.346471	0.213355	48	0.083466	0.146727	48
14	0.144722	0.154295	48	0.160719	0.16156	48	0.03685	0.084602	48
14.5	0.102685	0.105362	48	0.07772	0.092384	48	0.040321	0.073616	48
15	0.078516	0.099753	48	0.081436	0.127388	48	0.044593	0.086058	48
15.5	0.08758	0.10025	48	0.051991	0.065041	48	0.041813	0.076329	48
16	0.090761	0.110295	48	0.08155	0.140425	48	0.05307	0.088671	48
16.5	0.099272	0.129832	48	0.090647	0.089503	48	0.122208	0.151256	48
17	0.107811	0.145855	48	0.079059	0.099613	48	0.070617	0.081495	48
17.5	0.090613	0.124643	48	0.106385	0.147675	48	0.113028	0.159853	48
18	0.0499	0.078558	48	0.074432	0.092404	48	0.110711	0.119698	48
18.5	0.051244	0.06419	48	0.070041	0.079079	48	0.10233	0.12622	48
19	0.061118	0.091557	48	0.105351	0.15571	48	0.078719	0.09373	48
19.5	0.042614	0.059006	48	0.071062	0.077303	48	0.131793	0.150157	48
20	0.028381	0.04556	48	0.058346	0.079637	48	0.093559	0.153209	48
20.5	0.03375	0.061812	48	0.051601	0.076082	48	0.124092	0.131451	48
21	0.030522	0.061935	48	0.059445	0.074677	48	0.10857	0.116965	48
21.5	0.032904	0.06468	48	0.068495	0.081874	48	0.134764	0.12954	48
22	0.026093	0.05173	48	0.074044	0.089248	48	0.262924	0.174195	48
22.5	0.032635	0.061951	48	0.079203	0.08866	48	0.33562	0.228782	48
23	0.076043	0.142511	48	0.057474	0.089121	48	0.308342	0.213166	48
23.5	0.197851	0.230191	48	0.121295	0.142915	48	0.386437	0.23216	48
24	0.430495	0.306663	48	0.30722	0.216791	48	0.334691	0.173734	48
0.5	0.798188	0.180722	48	0.594764	0.177339	48	0.566858	0.224588	48
1	0.687943	0.174876	48	0.510928	0.166023	48	0.48049	0.182644	48
1.5	0.5817	0.166397	48	0.478714	0.137269	48	0.421787	0.181145	48
2	0.528512	0.138417	48	0.442807	0.139402	48	0.351206	0.161176	48
2.5	0.498345	0.150743	48	0.39679	0.138691	48	0.333644	0.173516	48
3	0.481634	0.160658	48	0.371171	0.124725	48	0.294072	0.169683	48
3.5	0.454972	0.135045	48	0.333811	0.130431	48	0.247868	0.177962	48
4	0.400132	0.155271	48	0.276073	0.117257	48	0.178653	0.143938	48
4.5	0.361306	0.151517	48	0.248621	0.115951	48	0.171617	0.1287	48
5	0.337559	0.135679	48	0.208133	0.111729	48	0.147541	0.116721	48
5.5	0.320962	0.11177	48	0.172164	0.101124	48	0.140062	0.134567	48
6	0.28741	0.102479	48	0.145375	0.091713	48	0.107806	0.137195	48

## Sheet: fig7E
w11118	CNMaRKO/+	CNMaRKO/KO
-0.13219	-0.08045	-0.03481
0.012339	-0.10247	0.027308
0.003696	-0.02799	0.375122
-0.14598	-0.16889	0.151491
-0.20099	-0.19133	0.02311
-0.20339	-0.03745	0.035198
-0.28648	-0.10088	0.2447
-0.05306	0.040244	0.215971
-0.09994	-0.14286	0.055793
-0.00897	-0.04163	0.129142
-0.00803	-0.22477	-0.04831
0.069106	-0.06634	-0.06984
-0.22064	0.109068	0.010994
-0.00176	-0.01228	0.032854
-0.07836	-0.15208	0.07748
-0.30897	-0.16698	0.09317
-0.13189	-0.02477	0.364646
-0.18004	-0.14528	0.062101
-0.24135	0.00504	0.077892
-0.22333	0.085805	0.011236
-0.02508	-0.04898	0.060346
-0.13081	-0.17843	0.16284
-0.18318	0.032417	0.102686
-0.28955	0.129814	0.242328
-0.008	0.117378	-0.01431
-0.09767	-0.1002	0.083456
-0.02376	-0.04376	0.011062
-0.16321	-0.05478	-0.03557
-0.14843	0.0018	-0.07733
-0.30289	-0.26564	-0.03601
0.004878	-0.1408	0.220983
-0.08602	-0.01456	0.072564
-0.1532	-0.0181	0.004551
-0.06573	-0.11396	0.005633
-0.20639	0.108607	-0.00121
0.01453	-0.10584	0.040424
-0.07041	-0.00125	-0.03996
-0.38651	-0.11154	0.155227
-0.06261	-0.15822	0.111106
0.000356	-0.00132	0.308647
-0.2701	-0.13076	0.016279
-0.20186	0.041357	-0.0969
-0.09317	-0.08705	0.090138
-0.0983	-0.22096	-0.02259
-0.0084	0.01686	0.024675
-0.31602	-0.05283	0.33223
-0.16458	-0.1793	0.074056
-0.24113	-0.22718	-0.13826

## Sheet: fig7I
male	elav>Cas9.M6			elav>sgRNACNMaR			elva>Cas9.M6,sgRNACNMaR			Cas9.M6,sgRNACNMaR
ZT	mean	sd	n	mean	sd	n	mean	sd	n	mean	sd	n
6.5	0.0425829	0.0302048	23	0.0939258	0.193275	21	0.0982543	0.0799216	22	0.0522836	0.0649063	23
7	0.0453661	0.03504	23	0.102578	0.243904	21	0.114955	0.105569	22	0.0452566	0.035091	23
7.5	0.0595523	0.0501307	23	0.100308	0.224002	21	0.104569	0.0871224	22	0.0631619	0.0634887	23
8	0.0584824	0.0441116	23	0.0919228	0.195454	21	0.105948	0.0806553	22	0.0908501	0.0836459	23
8.5	0.0799603	0.0516758	23	0.0865819	0.171189	21	0.157708	0.132956	22	0.0952118	0.0747635	23
9	0.098339	0.0613284	23	0.109361	0.147506	21	0.210274	0.16026	22	0.174598	0.139429	23
9.5	0.119895	0.0761266	23	0.0829303	0.109756	21	0.218876	0.123738	22	0.23331	0.11733	23
10	0.141366	0.0886291	23	0.0810546	0.0833031	21	0.247862	0.13765	22	0.298775	0.128239	23
10.5	0.182125	0.096132	23	0.162477	0.181846	21	0.331154	0.140102	22	0.371407	0.156003	23
11	0.315817	0.138226	23	0.231896	0.101053	21	0.458595	0.176622	22	0.512956	0.17261	23
11.5	0.500084	0.147034	23	0.388227	0.12346	21	0.623934	0.194163	22	0.678857	0.190443	23
12	0.661048	0.162556	23	0.519792	0.134304	21	0.76401	0.184331	22	0.776185	0.182018	23
12.5	0.971834	0.0716648	23	0.908771	0.233051	21	0.819027	0.240281	22	0.855123	0.212654	23
13	0.305727	0.316306	23	0.525705	0.262413	21	0.120806	0.190369	22	0.246073	0.264052	23
13.5	0.178421	0.261265	23	0.253602	0.25818	21	0.0775629	0.1437	22	0.108531	0.157355	23
14	0.112757	0.198265	23	0.121014	0.230062	21	0.0737899	0.088614	22	0.0575787	0.071728	23
14.5	0.0855408	0.123338	23	0.0753177	0.155611	21	0.0690042	0.0854904	22	0.0437414	0.058311	23
15	0.0778193	0.11255	23	0.0599347	0.13649	21	0.0495316	0.0460515	22	0.0528352	0.0565783	23
15.5	0.0739111	0.107159	23	0.063593	0.154177	21	0.0838362	0.100068	22	0.084915	0.157723	23
16	0.063514	0.0942881	23	0.0596607	0.120737	21	0.0794197	0.0661908	22	0.0605763	0.0782321	23
16.5	0.0765946	0.104817	23	0.0344556	0.0634082	21	0.0682706	0.0756359	22	0.0537096	0.085212	23
17	0.0723194	0.120674	23	0.0508654	0.0736457	21	0.0505994	0.0526203	22	0.0587783	0.0872695	23
17.5	0.0656442	0.0894087	23	0.0652449	0.117091	21	0.0660277	0.0583947	22	0.110331	0.142669	23
18	0.0730087	0.112127	23	0.0387903	0.0632414	21	0.0704089	0.0981918	22	0.0298079	0.0379645	23
18.5	0.0578188	0.0912322	23	0.0940612	0.167195	21	0.0587542	0.0651443	22	0.0477193	0.0774917	23
19	0.0528819	0.0840949	23	0.0320876	0.0347263	21	0.0618742	0.083844	22	0.0633582	0.0869115	23
19.5	0.0671385	0.123415	23	0.0835462	0.13588	21	0.0438402	0.0632612	22	0.0563865	0.0830993	23
20	0.0598603	0.0947105	23	0.0803978	0.192816	21	0.056864	0.0743325	22	0.0548203	0.0606518	23
20.5	0.0728544	0.11984	23	0.0896293	0.174418	21	0.0435025	0.0510718	22	0.0564954	0.112921	23
21	0.0800088	0.13032	23	0.0869175	0.13507	21	0.067466	0.0782894	22	0.0792065	0.0906307	23
21.5	0.0906789	0.131134	23	0.131527	0.128647	21	0.235439	0.144566	22	0.140995	0.143048	23
22	0.0624073	0.0679006	23	0.160659	0.150092	21	0.337491	0.184999	22	0.206382	0.189097	23
22.5	0.0929133	0.128642	23	0.14534	0.135059	21	0.418396	0.207122	22	0.205249	0.163824	23
23	0.220576	0.173155	23	0.20871	0.132722	21	0.367773	0.167649	22	0.346462	0.253469	23
23.5	0.387363	0.241573	23	0.266474	0.192138	21	0.413426	0.210637	22	0.430728	0.196627	23
24	0.411055	0.143029	23	0.327738	0.184061	21	0.46669	0.240867	22	0.403114	0.200908	23
0.5	0.609004	0.257341	23	0.637706	0.220374	21	0.653964	0.281191	22	0.634589	0.205097	23
1	0.422891	0.20234	23	0.35361	0.236942	21	0.388368	0.237051	22	0.307718	0.201979	23
1.5	0.238056	0.200893	23	0.169946	0.154936	21	0.284345	0.203548	22	0.206198	0.142713	23
2	0.125573	0.161736	23	0.111702	0.171517	21	0.194578	0.144278	22	0.142043	0.151055	23
2.5	0.0741484	0.121742	23	0.072089	0.121916	21	0.110974	0.0930008	22	0.0948174	0.0865277	23
3	0.0657706	0.11482	23	0.0890727	0.15541	21	0.107494	0.0795631	22	0.0486612	0.059126	23
3.5	0.060615	0.109525	23	0.065177	0.158658	21	0.091794	0.0592528	22	0.0560918	0.0860872	23
4	0.0590205	0.076104	23	0.0970446	0.180556	21	0.114428	0.0883899	22	0.060874	0.0597363	23
4.5	0.0543118	0.0719165	23	0.0688507	0.10752	21	0.0908792	0.0668571	22	0.0334453	0.0346365	23
5	0.0430834	0.0440135	23	0.0658647	0.129092	21	0.101702	0.092373	22	0.0542521	0.0548395	23
5.5	0.0375005	0.0308633	23	0.0887459	0.18661	21	0.10252	0.0769025	22	0.0526047	0.052838	23
6	0.0365179	0.0384607	23	0.0581774	0.161473	21	0.0984193	0.0723829	22	0.0376099	0.0400903	23

## Sheet: fig7J
elav>Cas9.M6	elav>sgRNA(CNMaR)	elva>Cas9.M6,sgRNA(CNMaR)	Cas9.M6,sgRNA(CNMaR)
-0.0804743		0.155213	-0.234653
-0.152668	-0.0414874
	-0.109884	0.214615	0.0130739
-0.0752729		0.200697	-0.114449
-0.0830489	-0.186854	0.0993325
	0.0417071	0.0183287	-0.0573607
-0.0857631	0.0299636		0.116308
0.0064927		-9.31e-05	0.0684777
-0.0482845	0.0236291	-0.00321977	-0.0814493
-0.154684	-0.0625275	0.350037	-0.00934569
	-0.236433	0.0646034	-0.0293135
-0.209362	-0.0545742	0.103879	-0.0151645
-0.231298	-0.0952618	0.176717	0.256536
-0.0966406	-0.135003	0.132078	-0.0133712
-0.0534495	0.140701	-0.0369813	-0.0936075
-0.121377		0.288247	-0.0173091
-0.160717		-0.0533678	-0.0307253
-0.17144	-0.0632012	0.12608	0.132663
-0.206683	-0.0950549	0.240126	-0.0619418
-0.22348	-0.105986		-0.0848299
		-0.0588659	-0.095645
-0.15214	-0.0458105	0.168932	0.117747
-0.0948531	0.0255273	0.20908	-0.0283954
-0.193075	0.185114		-0.163767

## Sheet: fig7K
female	elav>Cas9.M6			elav>sgRNACNMaR			elva>Cas9.M6,sgRNACNMaR			Cas9.M6,sgRNACNMaR
ZT	mean	sd	n	mean	sd	n	mean	sd	n	mean	sd	n
6.5	0.161904	0.100435	19	0.102696	0.0790018	22	0.172916	0.16326	23	0.0887175	0.081076	24
7	0.137209	0.114335	19	0.103699	0.0912701	22	0.14553	0.0889114	23	0.103518	0.0996071	24
7.5	0.132189	0.124893	19	0.0875024	0.060428	22	0.154817	0.13186	23	0.113703	0.0846589	24
8	0.130909	0.0930784	19	0.0904214	0.0771099	22	0.15992	0.108976	23	0.112695	0.0994975	24
8.5	0.130613	0.0813728	19	0.0870629	0.08414	22	0.196278	0.125574	23	0.118037	0.091288	24
9	0.138381	0.0817339	19	0.107756	0.0962657	22	0.192399	0.10023	23	0.15407	0.0999745	24
9.5	0.153833	0.113171	19	0.110703	0.0634518	22	0.217632	0.153354	23	0.195297	0.120038	24
10	0.189606	0.104873	19	0.143485	0.135433	22	0.263796	0.163154	23	0.227968	0.121679	24
10.5	0.226365	0.155471	19	0.175465	0.148476	22	0.302108	0.159383	23	0.323817	0.163237	24
11	0.306156	0.168582	19	0.221039	0.141719	22	0.40086	0.171928	23	0.439646	0.197566	24
11.5	0.385185	0.193249	19	0.330829	0.228182	22	0.529768	0.198443	23	0.526547	0.203404	24
12	0.546647	0.283318	19	0.46862	0.270756	22	0.708267	0.222669	23	0.681466	0.167385	24
12.5	0.89304	0.239372	19	0.928449	0.114972	22	0.787134	0.285226	23	0.843154	0.191905	24
13	0.435331	0.233235	19	0.462704	0.229798	22	0.310833	0.222723	23	0.427799	0.184477	24
13.5	0.191053	0.204704	19	0.258718	0.20487	22	0.130086	0.108045	23	0.192077	0.181121	24
14	0.0684754	0.0902498	19	0.146584	0.153246	22	0.0916894	0.0945689	23	0.118504	0.148218	24
14.5	0.0540083	0.0514247	19	0.0841186	0.0951302	22	0.05151	0.0560126	23	0.10601	0.108965	24
15	0.0460182	0.0556493	19	0.0802342	0.102424	22	0.0598992	0.0532097	23	0.0563632	0.0813663	24
15.5	0.0506082	0.056805	19	0.0502805	0.0823368	22	0.0558009	0.0647636	23	0.0495972	0.0736008	24
16	0.0519607	0.0466784	19	0.0529148	0.090366	22	0.040502	0.0467755	23	0.0594112	0.0698182	24
16.5	0.0456723	0.0649525	19	0.0462374	0.0633105	22	0.0396912	0.0595541	23	0.0365565	0.0345831	24
17	0.0513669	0.0407346	19	0.0447559	0.0621488	22	0.0725778	0.0953103	23	0.0275881	0.0337667	24
17.5	0.0507061	0.0596417	19	0.0581895	0.117085	22	0.0620278	0.0777789	23	0.0228388	0.0274351	24
18	0.0537475	0.0532783	19	0.0266399	0.0619272	22	0.050415	0.0657694	23	0.0168375	0.0267898	24
18.5	0.0322939	0.0375019	19	0.0419859	0.0681868	22	0.0781018	0.134729	23	0.0194902	0.0368749	24
19	0.0544449	0.0647634	19	0.0246239	0.038005	22	0.0630102	0.0761672	23	0.0201061	0.0339827	24
19.5	0.0624023	0.0888467	19	0.017817	0.0388722	22	0.0713718	0.0681796	23	0.0263202	0.048631	24
20	0.0605074	0.118502	19	0.0364116	0.0540621	22	0.0879092	0.135415	23	0.0166416	0.0481463	24
20.5	0.0774093	0.126326	19	0.0229109	0.037237	22	0.0698191	0.0831762	23	0.0151939	0.0358392	24
21	0.0559759	0.0755442	19	0.0379124	0.0554129	22	0.134098	0.140945	23	0.0159409	0.0306593	24
21.5	0.0409443	0.0761328	19	0.0826792	0.156671	22	0.238567	0.189118	23	0.0413658	0.0748661	24
22	0.0433764	0.0659465	19	0.0904367	0.110529	22	0.321655	0.197041	23	0.0845063	0.136094	24
22.5	0.0280205	0.0439337	19	0.0741868	0.0707248	22	0.39715	0.173242	23	0.0785865	0.113346	24
23	0.0172304	0.0381524	19	0.0807716	0.108463	22	0.392085	0.133908	23	0.102917	0.142049	24
23.5	0.0591933	0.116939	19	0.0958656	0.141624	22	0.40528	0.136951	23	0.183879	0.216904	24
24	0.128836	0.129868	19	0.203449	0.152763	22	0.363124	0.156175	23	0.360856	0.204022	24
0.5	0.620189	0.281966	19	0.777745	0.174374	22	0.761989	0.254296	23	0.83384	0.189275	24
1	0.568158	0.238514	19	0.620552	0.198722	22	0.631452	0.176642	23	0.551539	0.142278	24
1.5	0.497488	0.194042	19	0.470756	0.189861	22	0.524054	0.24472	23	0.454183	0.146834	24
2	0.413852	0.179827	19	0.411953	0.182834	22	0.465297	0.174571	23	0.347693	0.125512	24
2.5	0.35526	0.143172	19	0.330748	0.173512	22	0.352997	0.179214	23	0.319986	0.135264	24
3	0.299022	0.150635	19	0.300689	0.142289	22	0.30055	0.201124	23	0.269651	0.129043	24
3.5	0.27063	0.164203	19	0.235787	0.121152	22	0.313871	0.195205	23	0.251843	0.110104	24
4	0.231643	0.144559	19	0.193746	0.116245	22	0.259016	0.181085	23	0.206027	0.112865	24
4.5	0.200368	0.145139	19	0.191611	0.173698	22	0.252363	0.142327	23	0.162511	0.0882643	24
5	0.17167	0.105773	19	0.194813	0.153701	22	0.248715	0.151346	23	0.173893	0.0984226	24
5.5	0.170553	0.11094	19	0.144534	0.107653	22	0.16179	0.107052	23	0.141456	0.0977515	24
6	0.148781	0.107088	19	0.116189	0.0829032	22	0.184822	0.148683	23	0.0962389	0.10995	24

## Sheet: fig7L
elav>Cas9.M6	elav>sgRNA(CNMaR)	elva>Cas9.M6,sgRNA(CNMaR)	Cas9.M6,sgRNA(CNMaR)		female
-0.0117157	-0.00943389		-0.175248
-0.0058415	-0.0137646	0.131513	-0.146891
-0.00387151	0.0930587	0.0723176	-0.0937381
-0.0676647	-0.112953	0.0411513	0.0297076
-0.0356475	-0.109314	0.050796	0.111287
-0.0029831	0.0790934	0.0545104	0.0884012
	0.117041	0.315231	-0.0945941
-0.0968604	-0.0746306	-0.0160561	0.000652997
-0.000933727	-0.166822	0.019159	-0.125462
-0.0131675	0.0157185	0.151267	-0.105834
-0.150599		0.114143	-0.0790277
0.0244834	-0.0570425	0.102955	-0.0217802
-0.0358366		0.0665098	-0.109309
-0.0126824	-0.0563031	0.0631196	-0.0907213
-0.013923	-0.0811206	0.21825	-0.0710843
0.00130069	-0.0196583	0.0592039	-0.0300383
-0.144159	-0.0559144	0.0420832	-0.190278
-0.122393	-0.0263247	0.109668	-0.0924321
-0.0575224	-0.131699	0.192616	-0.0576657
	0.0167965	0.2996	-0.137327
	0.00285184	0.0233792	-0.091207
	-0.0425869		-0.048068
	0.0666179	0.132505	-0.0538062
	-0.060372	0.0403226	-0.0733326
